# Supplementary material for: Assessing Hybridization Risk Between ESA-Listed Native Bull Trout (Salvelinus confluentus) and Introduced Brook Trout (S. fontinalis) Using Habitat Modeling
Source: Frontiers journal article supplement (doi:10.3389/fenvs.2022.834860), 2022-03-07

## Appendix A

**Table S1.** Oregon sub-basins included in the study, identified by USGS 8<sup>th</sup> field hydrologic unit code (HUC8) and sub-basin name.

| <b>HUC8 #</b> | <b>Name</b>                  | <b>HUC8#</b> | <b>Name</b>            |
|---------------|------------------------------|--------------|------------------------|
| 16040201      | Upper Quinn                  | 17070307     | Trout                  |
| 17050116      | Upper Malheur                | 17080001     | Lower Columbia-Sandy   |
| 17050201      | Brownlee Reservoir           | 17090001     | Middle Fork Willamette |
| 17050202      | Burnt                        | 17090003     | Upper Willamette       |
| 17050203      | Powder                       | 17090004     | Mckenzie               |
| 17060101      | Hells Canyon                 | 17090005     | North Santiam          |
| 17060102      | Imnaha                       | 17090006     | South Santiam          |
| 17060103      | Lower Snake-Asotin           | 17090011     | Clackamas              |
| 17060104      | Upper Grande Ronde           | 17100301     | North Umpqua           |
| 17060105      | Wallowa                      | 17100302     | South Umpqua           |
| 17060106      | Lower Grande Ronde           | 17100307     | Upper Rogue            |
| 17070101      | Middle Columbia-Lake Wallula | 17100309     | Applegate              |
| 17070102      | Walla Walla                  | 17100310     | Lower Rogue            |
| 17070103      | Umatilla                     | 17100311     | Illinois               |
| 17070105      | Middle Columbia-Hood         | 17120002     | Silvies                |
| 17070201      | Upper John Day               | 17120005     | Summer Lake            |
| 17070202      | North Fork John Day          | 17120006     | Lake Abert             |
| 17070203      | Middle Fork John Day         | 17120007     | Warner Lakes           |
| 17070204      | Lower John Day               | 18010201     | Williamson             |
| 17070301      | Upper Deschutes              | 18010202     | Sprague                |
| 17070302      | Little Deschutes             | 18010203     | Upper Klamath Lake     |
| 17070304      | Upper Crooked                | 18010206     | Upper Klamath          |
| 17070305      | Lower Crooked                | 18020001     | Goose Lake             |
| 17070306      | Lower Deschutes              |              |                        |

## Appendix B

**Table S2.** Bull Trout and Brook Trout presence, by HUC8 and sub-basin name. X indicates species presence based on ODFW fish habitat database.

| <b>HUC8 #</b> | <b>HUC Name</b>              | <b>Bull Trout</b> | <b>Brook Trout</b> |
|---------------|------------------------------|-------------------|--------------------|
| 16040201      | Upper Quinn                  |                   | X                  |
| 17050116      | Upper Malheur                | X                 | X                  |
| 17050201      | Brownlee Reservoir           | X                 | X                  |
| 17050202      | Burnt                        |                   | X                  |
| 17050203      | Powder                       | X                 | X                  |
| 17060101      | Hells Canyon                 | X                 |                    |
| 17060102      | Imnaha                       | X                 |                    |
| 17060103      | Lower Snake-Asotin           | X                 |                    |
| 17060104      | Upper Grande Ronde           | X                 | X                  |
| 17060105      | Wallowa                      | X                 | X                  |
| 17060106      | Lower Grande Ronde           | X                 |                    |
| 17070101      | Middle Columbia-Lake Wallula | X                 |                    |
| 17070102      | Walla Walla                  | X                 |                    |
| 17070103      | Umatilla                     | X                 |                    |
| 17070105      | Middle Columbia-Hood         | X                 | X                  |
| 17070201      | Upper John Day               | X                 | X                  |
| 17070202      | North Fork John Day          | X                 | X                  |
| 17070203      | Middle Fork John Day         | X                 | X                  |
| 17070204      | Lower John Day               | X                 |                    |
| 17070301      | Upper Deschutes              | X                 | X                  |
| 17070302      | Little Deschutes             | X                 | X                  |
| 17070304      | Upper Crooked                | X                 | X                  |
| 17070305      | Lower Crooked                | X                 |                    |
| 17070306      | Lower Deschutes              | X                 | X                  |
| 17070307      | Trout                        | X                 |                    |
| 17080001      | Lower Columbia-Sandy         | X                 | X                  |
| 17090001      | Middle Fork Willamette       | X                 | X                  |
| 17090003      | Upper Willamette             | X                 |                    |
| 17090004      | Mckenzie                     | X                 | X                  |
| 17090005      | North Santiam                | X                 | X                  |
| 17090006      | South Santiam                | X                 | X                  |
| 17090011      | Clackamas                    | X                 | X                  |
| 17100301      | North Umpqua                 |                   | X                  |
| 17100302      | South Umpqua                 |                   | X                  |
| 17100307      | Upper Rogue                  |                   | X                  |

| <b>HUC8 #</b> | <b>HUC Name</b>    | <b>Bull Trout</b> | <b>Brook Trout</b> |
|---------------|--------------------|-------------------|--------------------|
| 17100309      | Applegate          |                   | X                  |
| 17100310      | Lower Rogue        |                   | X                  |
| 17100311      | Illinois           |                   | X                  |
| 17120002      | Silvies            |                   | X                  |
| 17120005      | Summer Lake        |                   | X                  |
| 17120006      | Lake Abert         |                   | X                  |
| 17120007      | Warner Lakes       |                   | X                  |
| 18010201      | Williamson         |                   | X                  |
| 18010202      | Sprague            | X                 | X                  |
| 18010203      | Upper Klamath Lake | X                 | X                  |
| 18010206      | Upper Klamath      |                   | X                  |
| 18020001      | Goose Lake         |                   | X                  |

## Appendix C

### Researcher Survey 1

Hello,

My name is Michael Manning, I'm a graduate student at Oregon State University in the Fisheries Science program. My project is focused on modeling the risk of hybridization between native and introduced salmonids based on landscape variables. My approach is an adaptation of Intrinsic Potential Model described by Burnett et al. (2007), where I will be looking at the spawning habitat preferences of *Salvelinus confluentus* (native to the region) and *S. fontinalis* (introduced). To better define the variables that will be included in the model, I am conducting a survey of researchers who have published work related to *S. fontinalis*.

The survey has four questions and should take no more than five minutes to complete. The questions cover stream temperature, gradient, discharge, and valley width index (VWI). Valley width index is the ratio between the valley floor and the active channel width and will be used to describe valley confinement in relation to the stream reach being modelled.

This is the first part of a two-part survey. Based on survey responses a series of graphs will be produced, those graphs will be shared with you later this summer to obtain your opinion on inflection points and other observed trends in *S. fontinalis* spawning preferences.

Everyone who completes these surveys will be entered in a drawing to receive a printed copy of the Brook Trout print drawn by Pamela Corwin, a wildlife and fisheries biologist with the South Carolina Department of Natural Resources, that was featured on cover of the Jan/Feb 2020 issue of S.C. Wildlife.

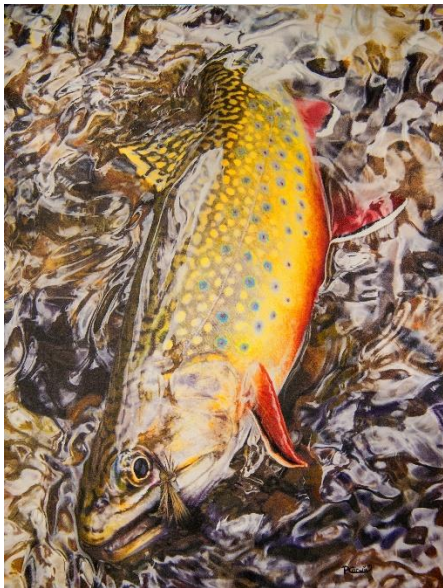

Thank you for your time, and if you have any questions or concerns please don't hesitate to contact me.

Michael A. Manning  
Department of Fisheries and Wildlife  
Oregon State University

## Brook Trout Habitat Preference Survey 1

**Instructions:** Thank you for completing the Brook Trout spawning habitat survey.

We are developing a GIS model to assess the risk of hybridization between native Bull Trout (*Salvelinus confluentus*) and introduced Brook Trout (*S. fontinalis*) in Oregon. Part of our predictive model includes an adaptation of the Intrinsic Potential Model (Burnett et. al, 2007) that uses landscape characteristics (i.e., topography) to model stream reaches most suitable as spawning habitat. To better define in our model the range of habitat conditions used by spawning *S. fontinalis* we are surveying experts that have published work related to habitat use by this species. Based on your experience, please indicate spawning *S. fontinalis* habitat preferences for the parameters listed below.

**This is the first part of a two-part survey. Based on survey responses a series of graphs will be produced, those graphs will be shared with you later this summer to obtain your opinion on inflection points and other observed trends in *S. fontinalis* spawning preferences.**

The link to this survey will expire at 11:59 pm (PDT UTC -7:00, Pacific Time) on Sunday, September 6<sup>th</sup>.

**Q1** Temperature affects all aspects of aquatic life. Using the sliders below, please select what you believe are the critical upper and lower stream temperature (Celsius) limits for *S. fontinalis* spawning. If you are unsure or don't believe that stream temperature is important, leave both sliders set at zero.

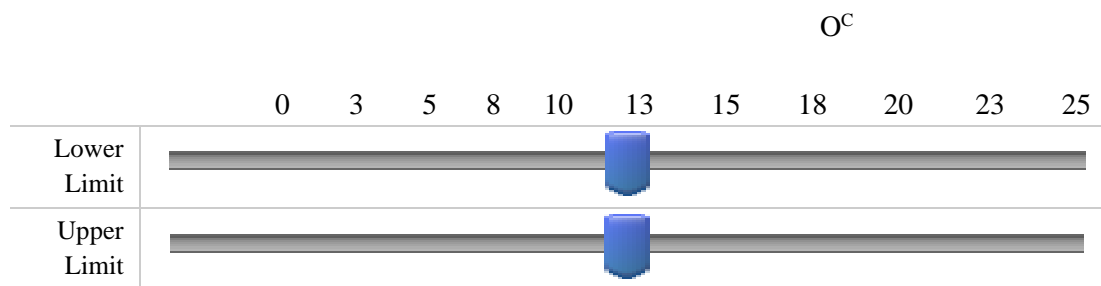

**Q2** Stream Gradient. Using the slider below, please select what you believe is the maximum stream gradient where you would expect to find spawning *S. fontinalis*.

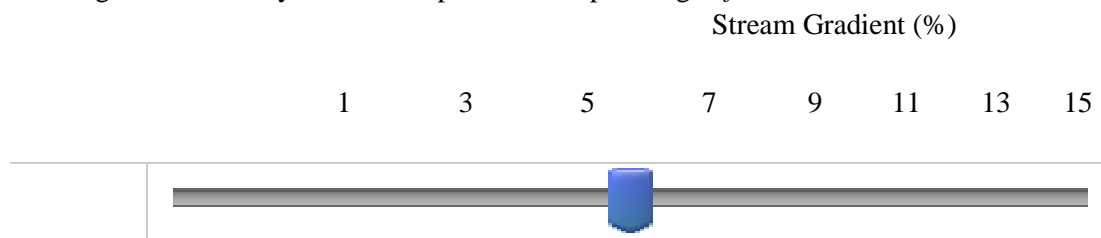

**Q3 Stream Discharge.** Please use the sliders below to select what you consider the minimum and maximum mean monthly stream discharge rates preferred by spawning *S. fontinalis*.

Mean Monthly Discharge ( $\text{m}^3/\text{s}$ )

0    3    5    8    10    13    15    18    20    23    25

|                                 |                                                                                    |
|---------------------------------|------------------------------------------------------------------------------------|
| Minimum<br>Monthly<br>Discharge | 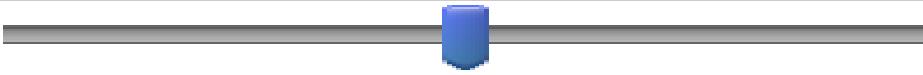 |
| Maximum<br>Monthly<br>Discharge |  |

**Q4 Valley Constraint.** Measured as Valley Width Index, the ratio of valley floor width to channel width. A VWI of 5.0 or less is considered constrained, while a VWI of 10.0 or greater is considered unconstrained. Please use the sliders below to identify the range of valley constraint preferred by spawning *S. fontinalis*.

Constrained Valley    Moderate Valley Constraint    Unconstrained Valley

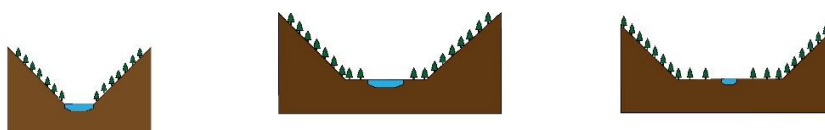

0                      5                      10                      15

|                |                                                                                      |
|----------------|--------------------------------------------------------------------------------------|
| Minimum<br>VWI | 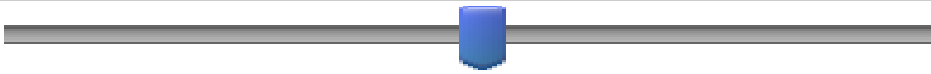 |
| Maximum<br>VWI |  |

If you believe that other habitat characteristics critical for spawning *S. fontinalis* have been overlooked, the ranges for the parameters above are incorrect, or have any other comments, please provide them in the space below.

---

## Researcher Survey 2

Hello,

My name is Michael Manning, I'm a graduate student at Oregon State University in the Fisheries Science program. Late in the summer of 2020 you were contacted and asked to participate in survey I was conducting about Brook Trout (*Salvelinus fontinalis*) **spawning habitat** preferences. This is the second part of the Brook Trout Spawning Habitat Survey.

The survey has four questions and should take no more than ten minutes to complete. The responses to the first survey were used to develop Suitability Index (SI) curves for **Brook Trout spawning habitat**. The SI curves included in this survey are based on response means from the earlier survey. The purpose of this survey is to better define those curves before they are incorporated into the hybridization risk model.

Each of the SI curves include inflection points representing absolute minimum & maximum thresholds, as well as optimal minimum and maximum values. You are asked to use the sliders corresponding to each point to select the appropriate values for the related landscape characteristic.

Everyone who completes these surveys will be entered in a drawing to receive a printed copy of the Brook Trout print drawn by Pamela Corwin, a wildlife and fisheries biologist with the South Carolina Department of Natural Resources, that was featured on cover of the Jan/Feb 2020 issue of S.C. Wildlife. The survey links are created for each of you individually, please do not forward your survey. If there is someone that you think should be included, please email me their information and a link will be created for them.

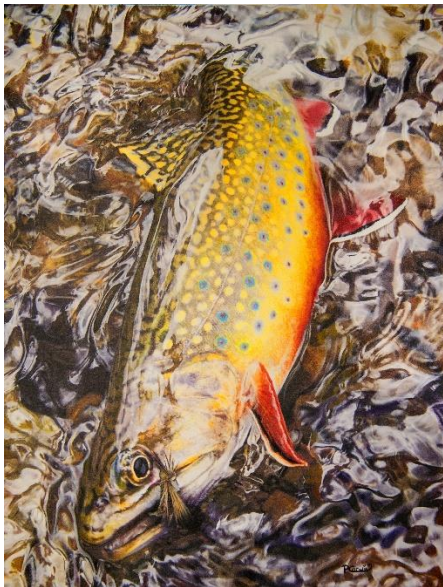

Thank you for your time, and if you have any questions or concerns please don't hesitate to contact me.

Michael A. Manning  
Department of Fisheries and Wildlife  
Oregon State University

## Brook Trout Habitat Preference Survey 2

**Instructions:** Thank you for completing the Brook Trout Spawning Habitat Survey 2.0.

We are developing a model to quantify the risk of hybridization between native Bull Trout (*Salvelinus confluentus*) and introduced Brook Trout (*S. fontinalis*) in Oregon, based on specific landscape variables. Our approach includes an adaptation of the Intrinsic Potential Model (Burnett et. al, 2007) that uses landscape characteristics (i.e., topography) to model stream reaches most suitable as **Brook Trout spawning habitat**.

This is the follow-up to the Brook Trout Spawning Habitat Survey completed in the Fall of 2020. The results of the Fall survey were used to develop Suitability Index (SI) curves based on the minimum and maximum values from your responses. The proposed SI curves are presented below. This second survey requires that the SI curves be refined to include optimum ranges, as well as the tails of the distributions. Please use the slider that corresponds to the inflection points in each diagram to identify the appropriate thresholds for each curve.

To start the survey, please click the arrow below.

**Q1 – Stream Temperature:** In the first survey, respondents were asked to select critical upper and lower stream temperature (Celsius) limits for **Brook Trout spawning conditions**. The responses for the Lower Limit ranged from 0.0°C to 10.3°C, with a mean of 4.7°C, a median of 4.6°C, and a standard deviation of 2.7°C. The responses for the Upper Limit ranged from 7.2°C to 22.0°C, with a mean of 13.8°C, a median of 12.6°C, and a standard deviation of 4.3°C.

In the diagram below, Point 1 represents the absolute minimum stream temperature for **Brook Trout spawning**. Point 2 represents the minimum limit of the optimum range in stream temperatures. Point 3 represents the maximum limit of the optimum range in stream temperatures, and Point 4 represents the absolute maximum stream temperature for **Brook Trout spawning**.

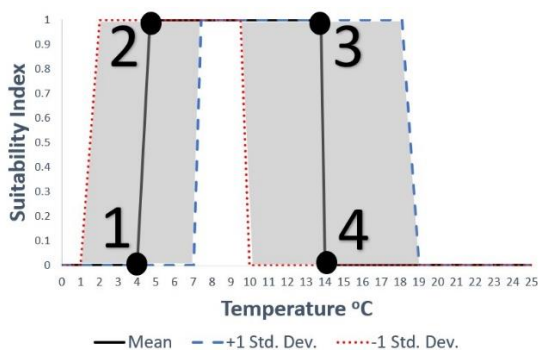



Using the sliders below, please select the appropriate temperature for each of the points above.

Point 1: Please select the absolute minimum stream temperature required for **Brook Trout spawning**.

Point 2: Please select the minimum optimal stream temperature for **Brook Trout spawning**.

Point 3: Please select the maximum optimal stream temperature for **Brook Trout spawning**.

Point 4: Please select the absolute maximum stream temperature for **Brook Trout spawning**.

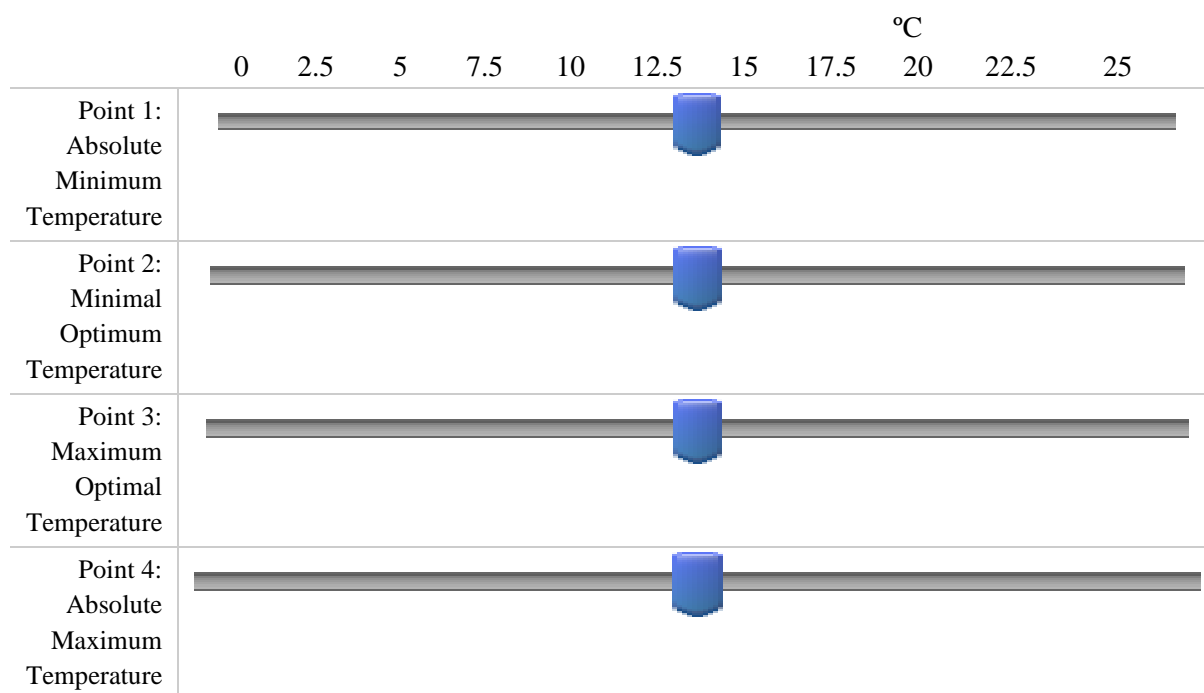

**Q2 – Gradient:** In the first survey, respondents were asked to select the Maximum Gradient suitable for **Brook Trout spawning**. The responses for the Maximum Gradient ranged from 1.0% to 15.0%, with a mean of 6.2%, a median of 5.3%, and a standard deviation of 3.2.

In the diagram below, Point 1 represents the absolute minimum stream gradient for **Brook Trout spawning**. Point 2 represents the optimal minimum stream gradient. Point 3 represents the optimal maximum stream gradient and Point 4 represents the maximum stream gradient for **Brook Trout spawning**.

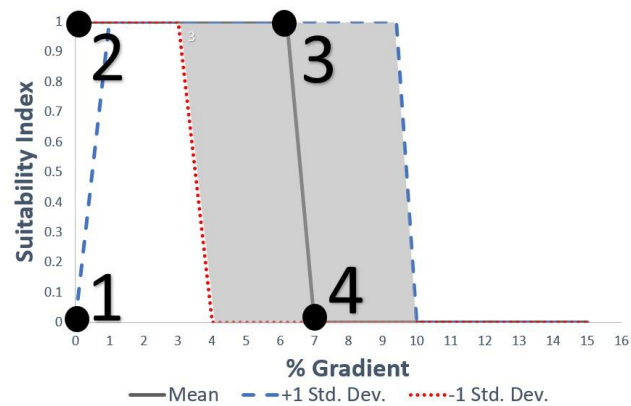

Using the sliders below, please select the appropriate gradient for each of the points above.

Point 1: Please select the absolute minimum stream gradient for **Brook Trout spawning**.

Point 2: Please select the minimum optimal stream gradient for **Brook Trout spawning**.

Point 3: Please select the maximum optimal stream gradient for **Brook Trout spawning**.

Point 4: Please select the absolute maximum stream gradient for **Brook Trout spawning**.

|                                             | Stream Gradient (%) |   |   |   |    |    |
|---------------------------------------------|---------------------|---|---|---|----|----|
|                                             | 0                   | 3 | 6 | 9 | 12 | 15 |
| Point 1:<br>Absolute<br>Minimum<br>Gradient |                     |   |   |   |    |    |
| Point 2:<br>Minimum<br>Optimal<br>Gradient  |                     |   |   |   |    |    |
| Point 3:<br>Maximum<br>Optimal<br>Gradient  |                     |   |   |   |    |    |
| Point 4:<br>Absolute<br>Maximum<br>Gradient |                     |   |   |   |    |    |

**Q3 – Discharge:** Respondents to the first survey were asked to identify the minimum and maximum monthly discharge rates during **Brook Trout spawning**. Responses for Minimum Discharge ranged from 0.1 to 7.3 m<sup>3</sup>/s, with a mean of 1.4 m<sup>3</sup>/s, a median of 0.3 m<sup>3</sup>/s, and a standard deviation of 2.0 m<sup>3</sup>/s. Responses for Maximum Discharge ranged from 7.1 to 25.0 m<sup>3</sup>/s, with a mean of 17.3 m<sup>3</sup>/s, a median of 15.4 m<sup>3</sup>/s, and a standard deviation of 7.8 m<sup>3</sup>/s.

In the diagram below, Point 1 represents the absolute minimum discharge for Brook Trout spawning. Point 2 represents the optimal minimum discharge. Point 3 represents the optimal maximum discharge and Point 4 represents the absolute maximum discharge for **Brook Trout spawning**.

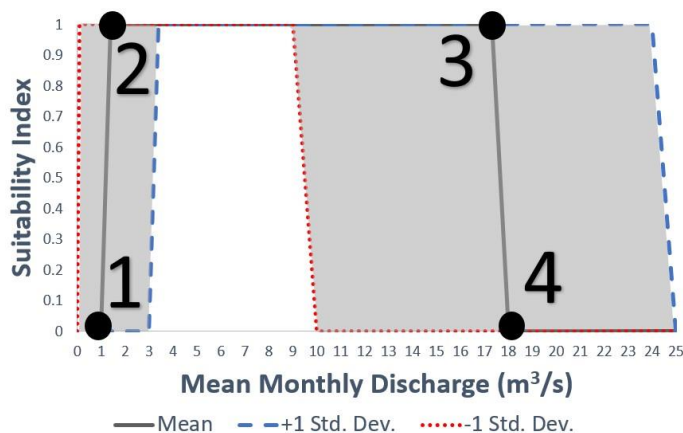

Using the sliders below, please select the appropriate discharge for each of the points above.

Point 1: Please select the absolute minimum stream discharge for **Brook Trout spawning**.

Point 2: Please select the minimum optimal stream discharge for **Brook Trout spawning**.

Point 3: Please select the maximum optimal stream discharge for **Brook Trout spawning**.

Point 4: Please select the absolute maximum stream discharge for **Brook Trout spawning**.

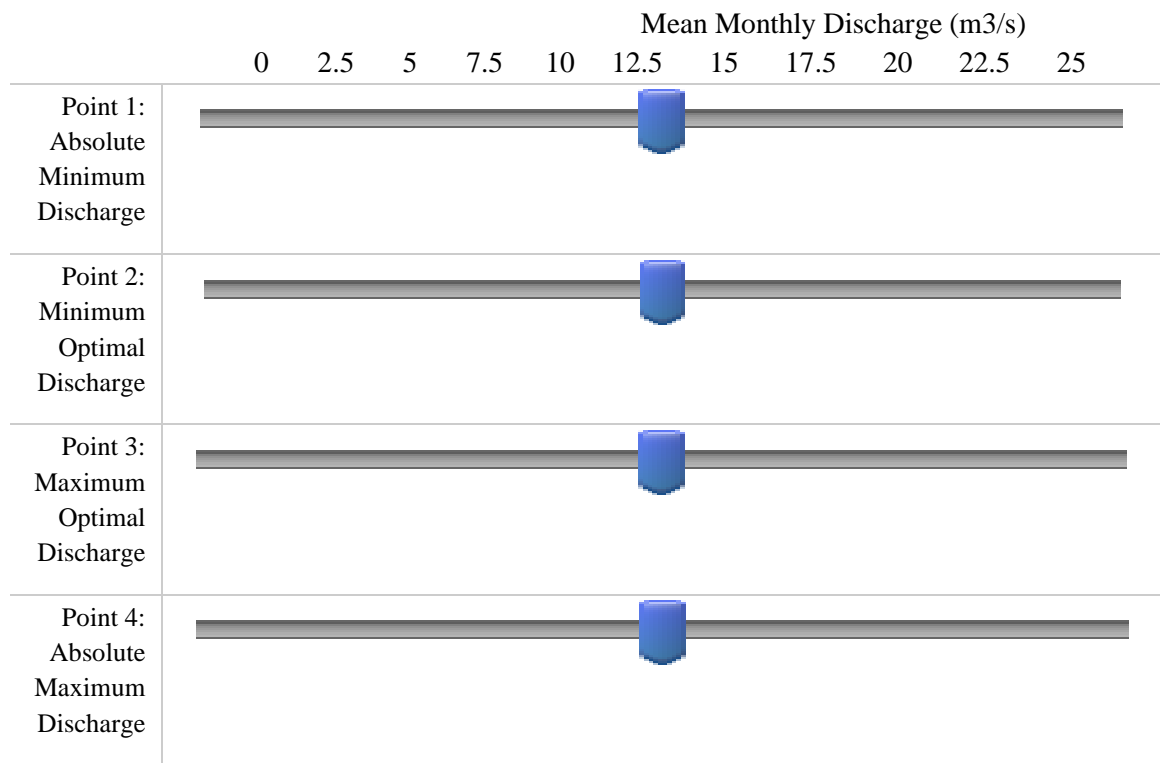

**Q4 – Valley Constraint:** Measured as Valley Width Index, the ratio of valley floor width to channel width. A VWI of 5.0 or less is considered constrained, while a VWI of 10.0 or greater is considered unconstrained.

The responses from the first survey for the Minimum Valley Width Index (VWI) ranged from 0.0 to 14.0, with a mean of 2.6, a median of 1.0, and a standard deviation of 3.4. The responses for the Maximum VWI ranged from 4.0 to 15.0, with a mean of 13.1, a median of 15.0, and a standard deviation of 3.03.

In the diagram below, Point 1 represents the minimum VWI for **Brook Trout spawning**. Point 2 represents the optimal minimum VWI. Point 3 represents the optimal maximum VWI, and Point 4 represents the maximum VWI for **Brook Trout spawning**.

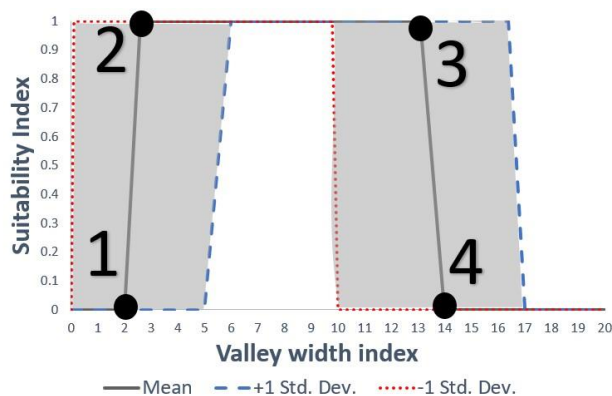

Using the sliders below, please select the appropriate VWI for each of the points above.

Point 1: Please select the absolute minimum VWI for **Brook Trout spawning**.

Point 2: Please select the minimum optimal VWI for **Brook Trout spawning**.

Point 3: Please select the maximum optimal VWI for **Brook Trout spawning**.

Point 4: Please select the absolute maximum VWI for **Brook Trout spawning**.

|  |                                                                                   |                                                                                    |                                                                                     |
|--|-----------------------------------------------------------------------------------|------------------------------------------------------------------------------------|-------------------------------------------------------------------------------------|
|  | 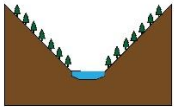 |  |  |
|  | Constrained Valley                                                                | Moderate Valley Constraint                                                         | Unconstrained Valley                                                                |

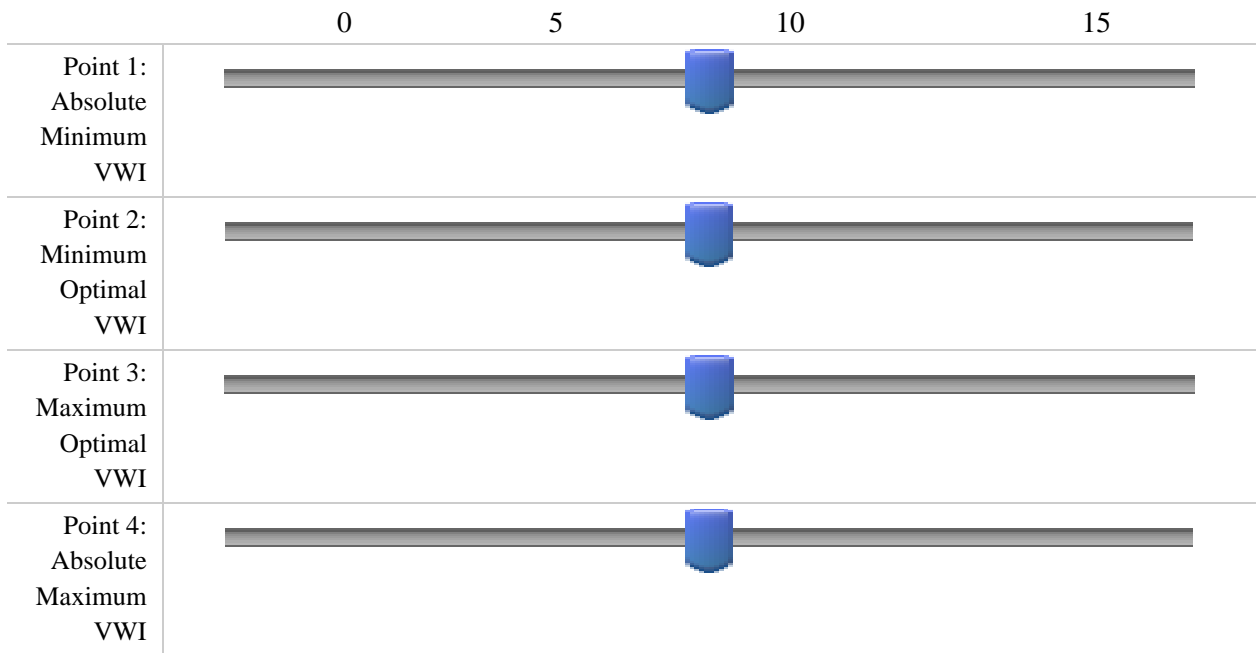

If you have any other comments, please provide them in the space below.

## **Appendix D**

### **Risk Maps**

Example maps illustrating hybridization risk at the state level and for each HUC8 sub-basin in the study area based on Tables S1 and S2. Additional maps at the watershed (HUC10) scale are included to show greater detail of reaches with Moderate to Extreme risk within their respective sub-basins.

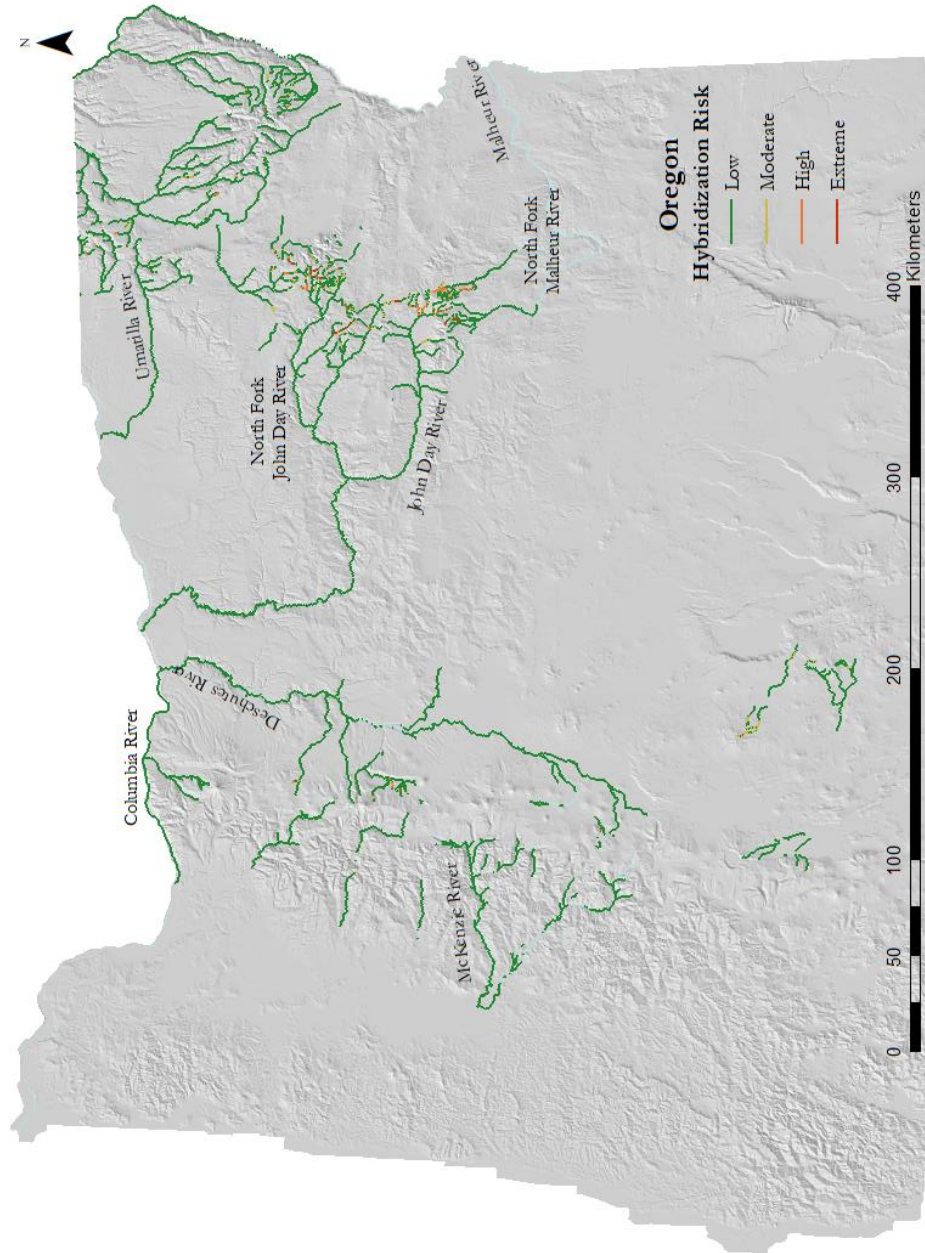



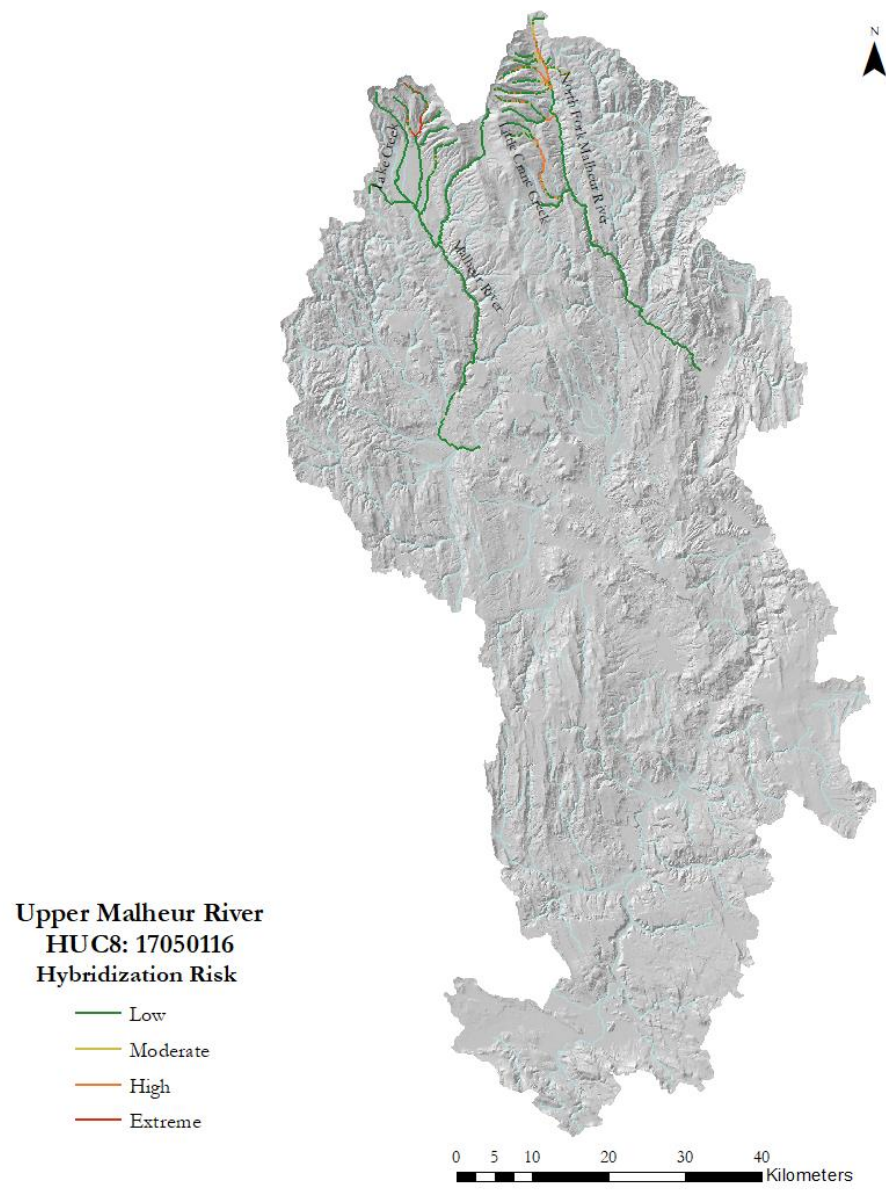

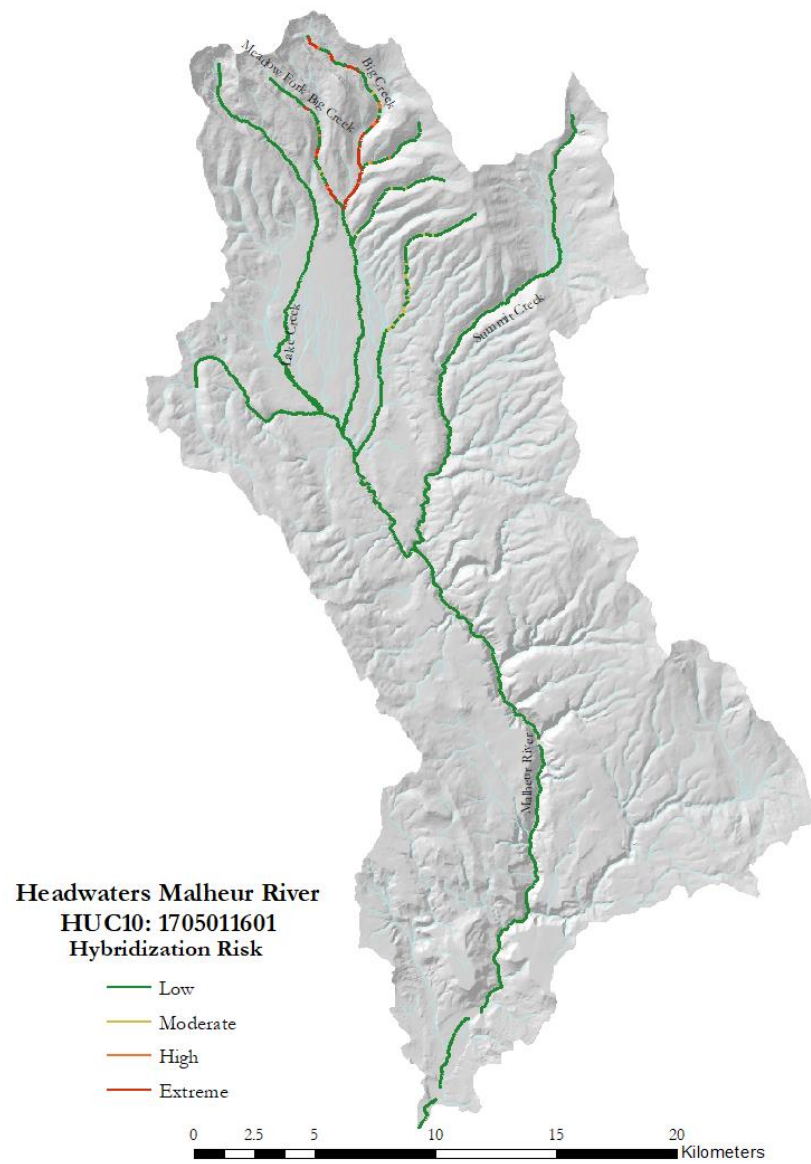

Upper North Fork Malheur River  
HUC10: 1705011611  
Hybridization Risk

- Low
- Moderate
- High
- Extreme

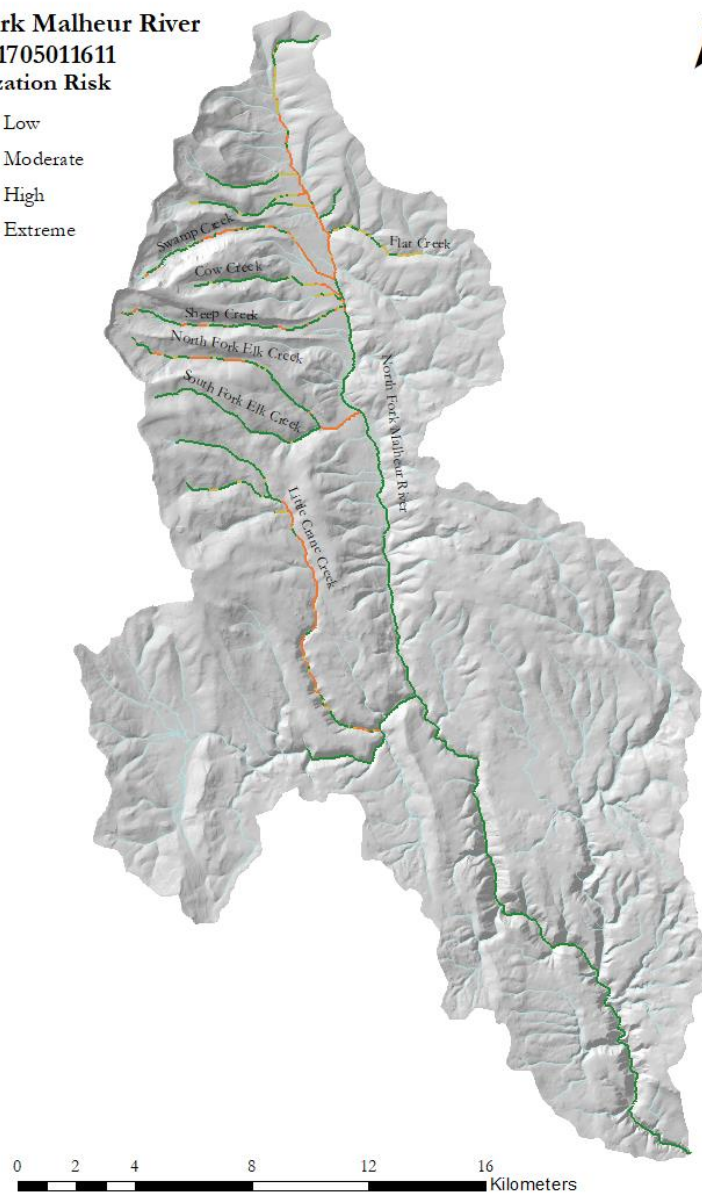

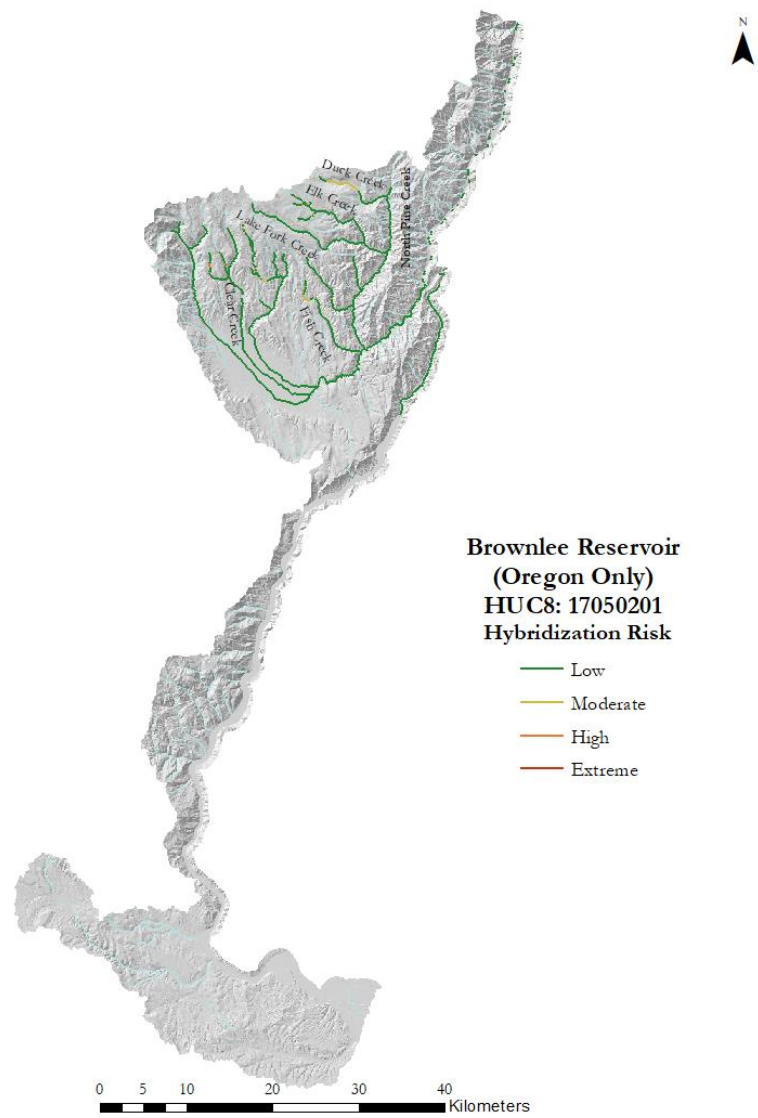

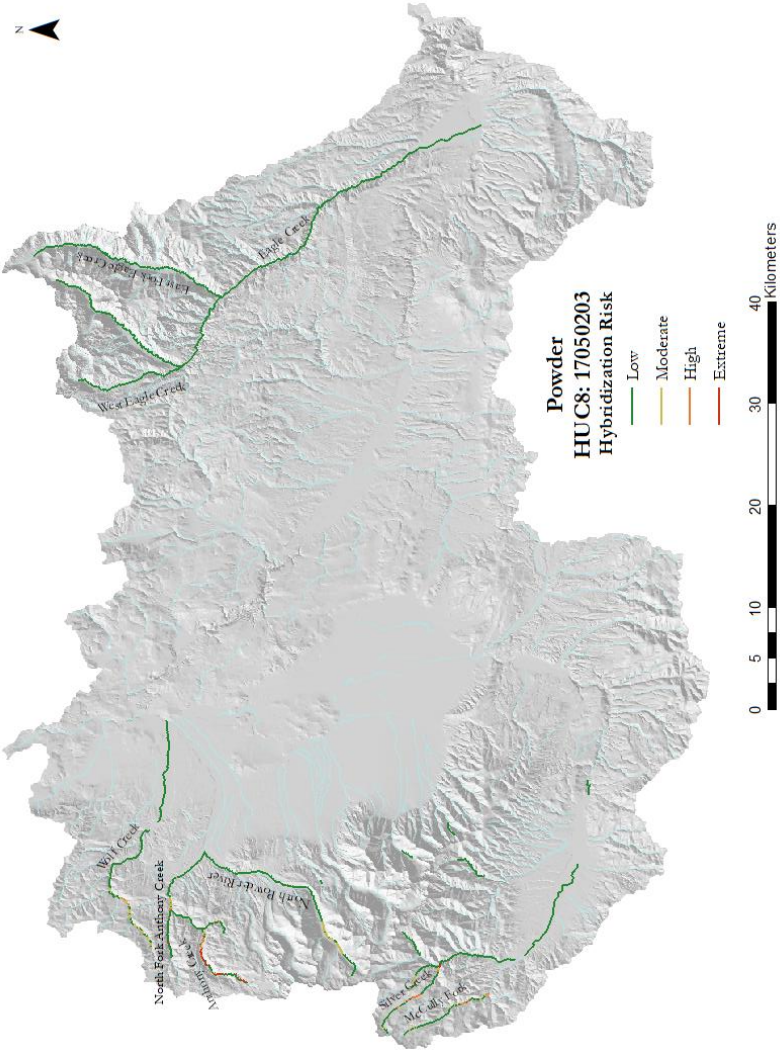

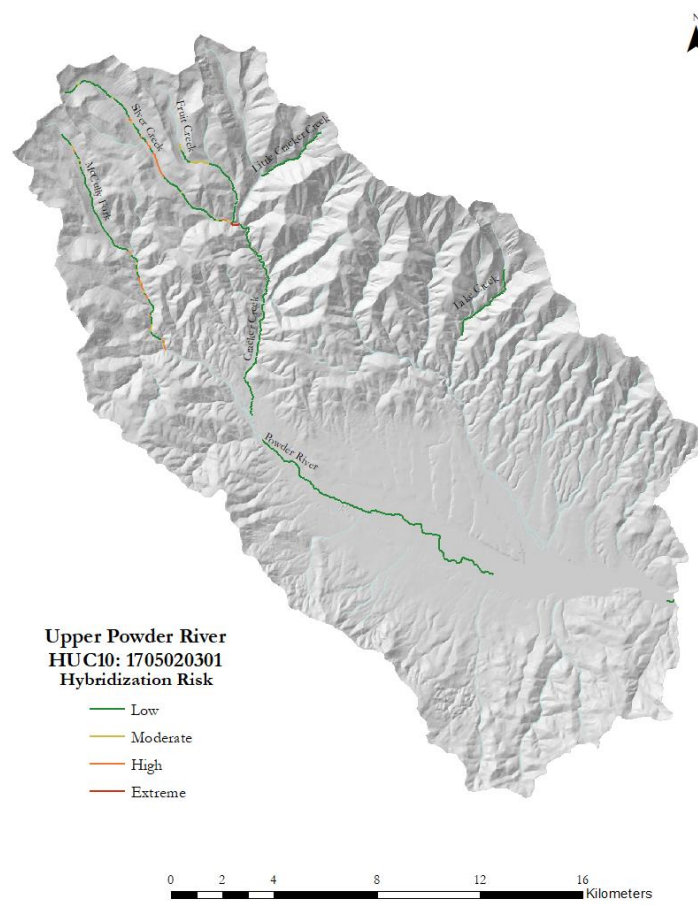



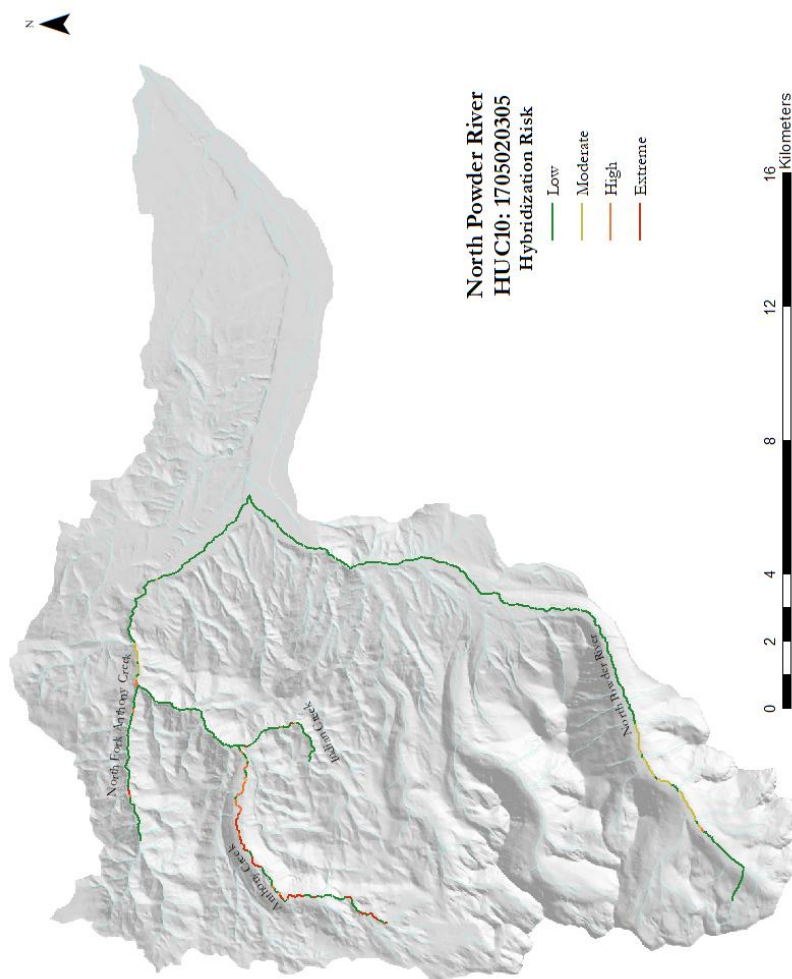

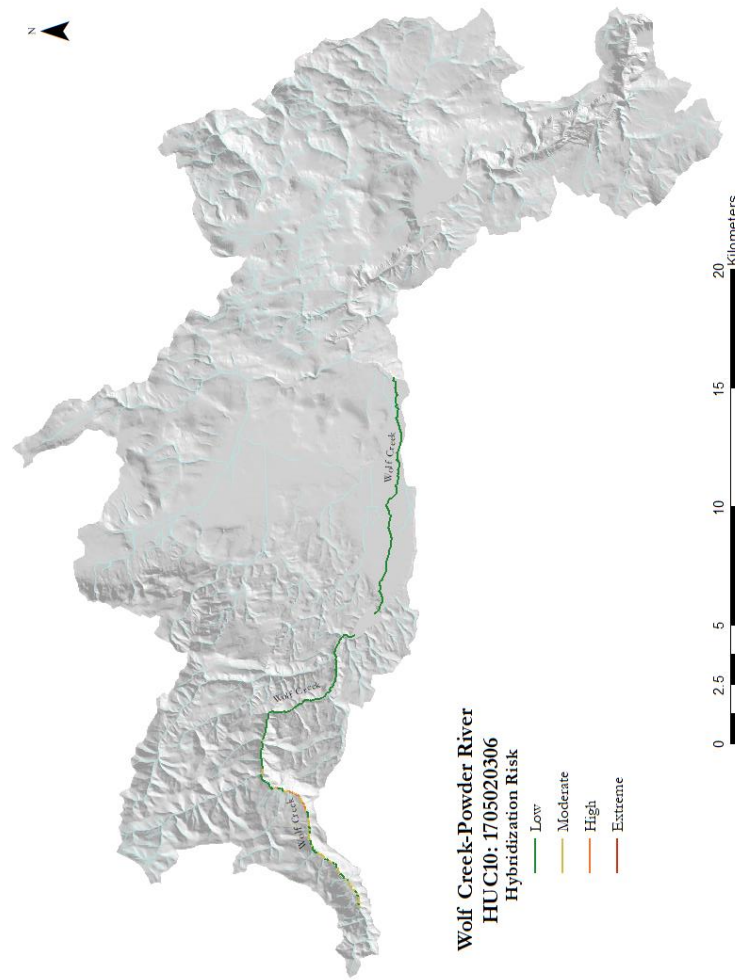



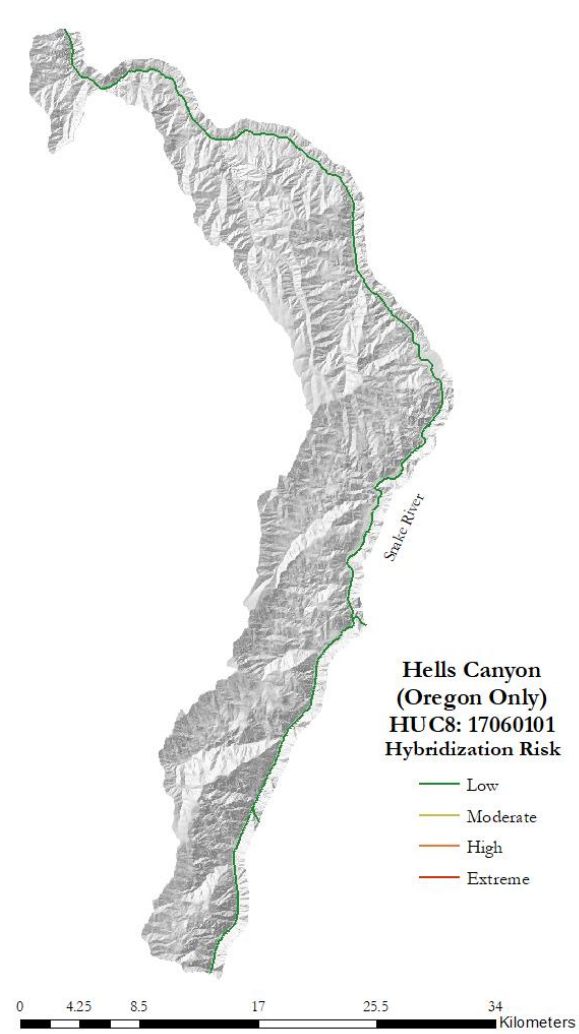

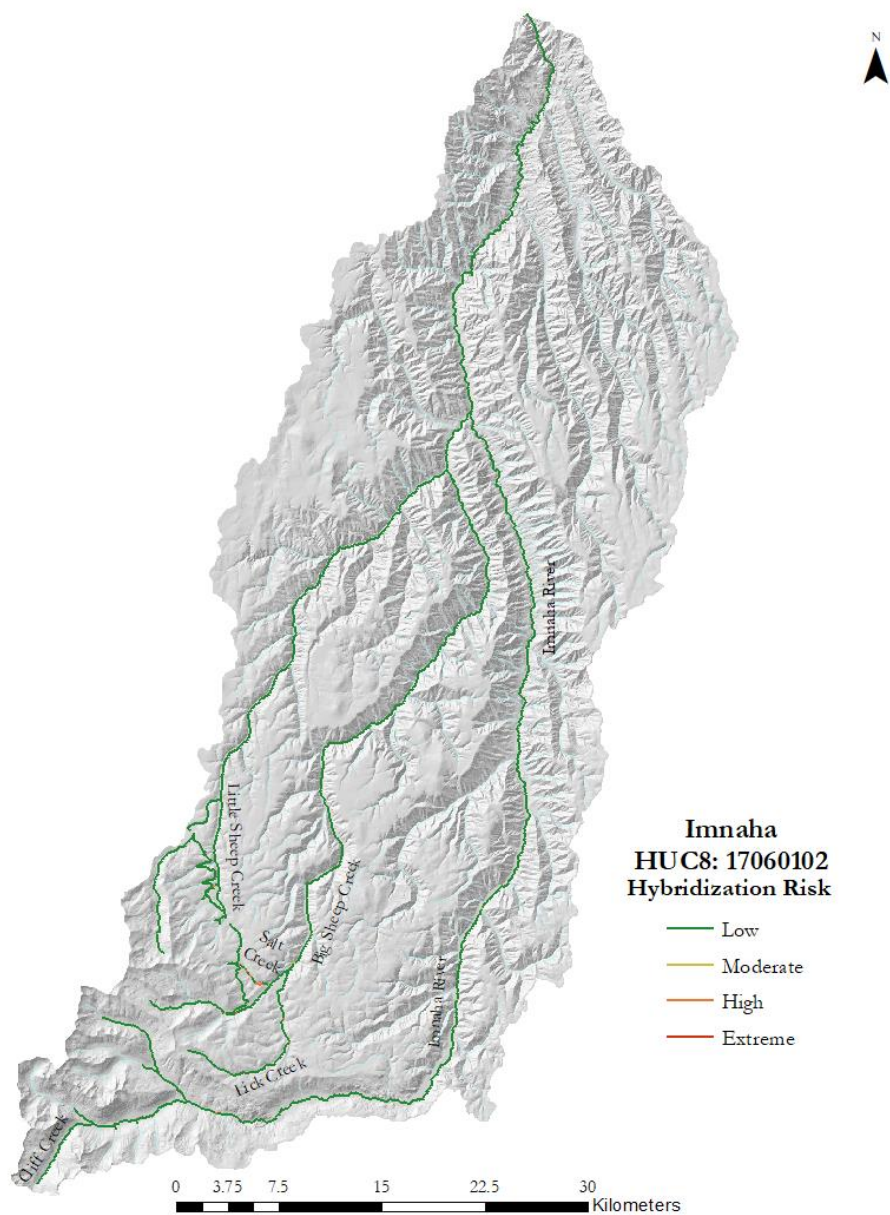

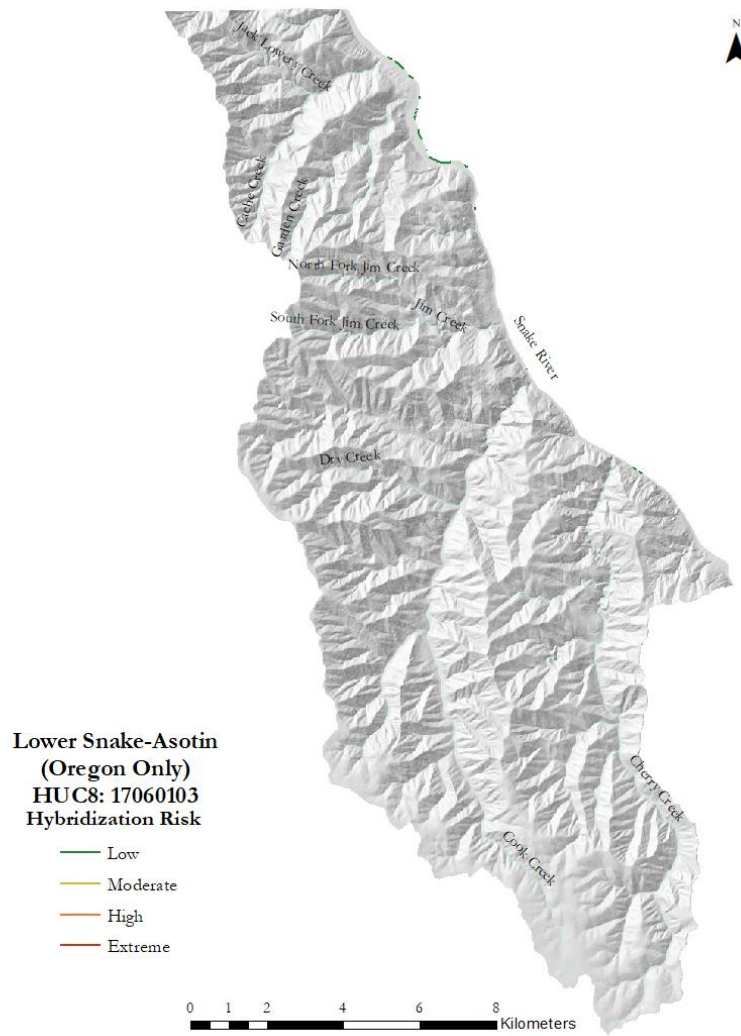

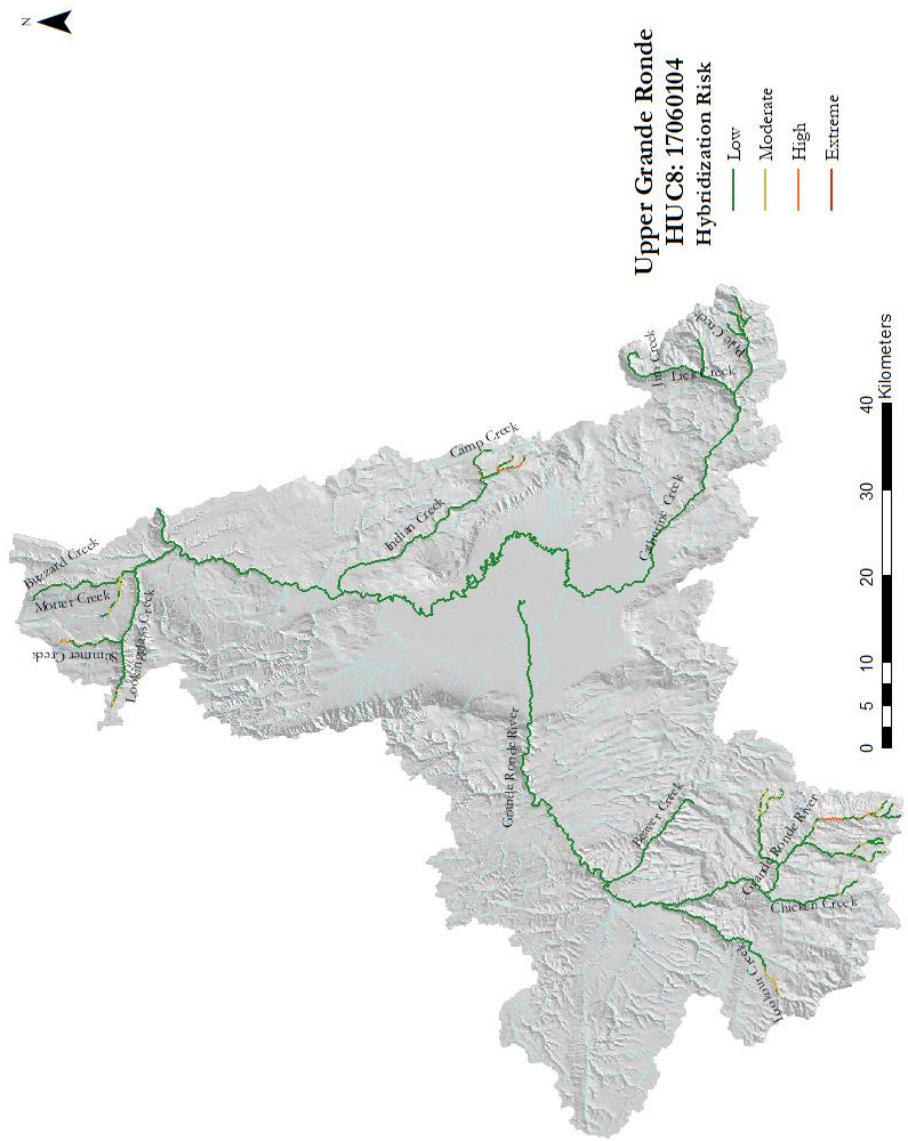

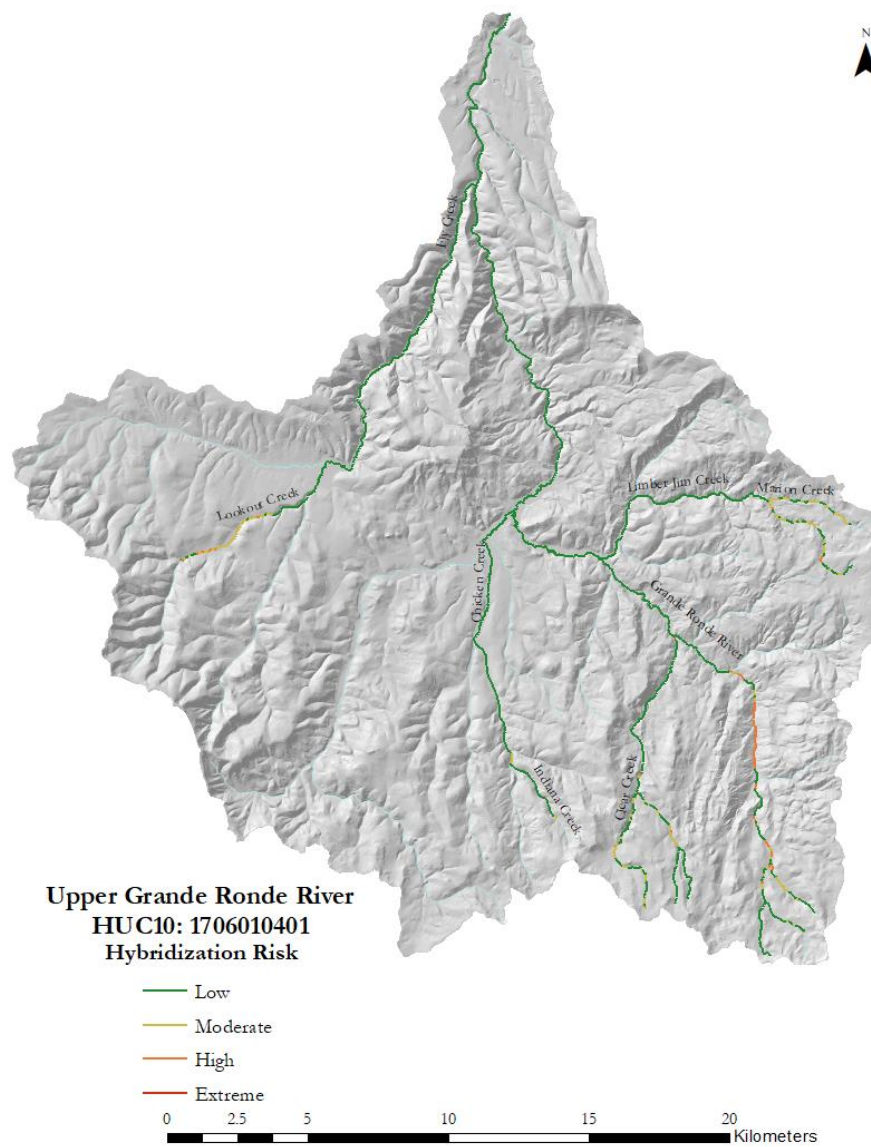

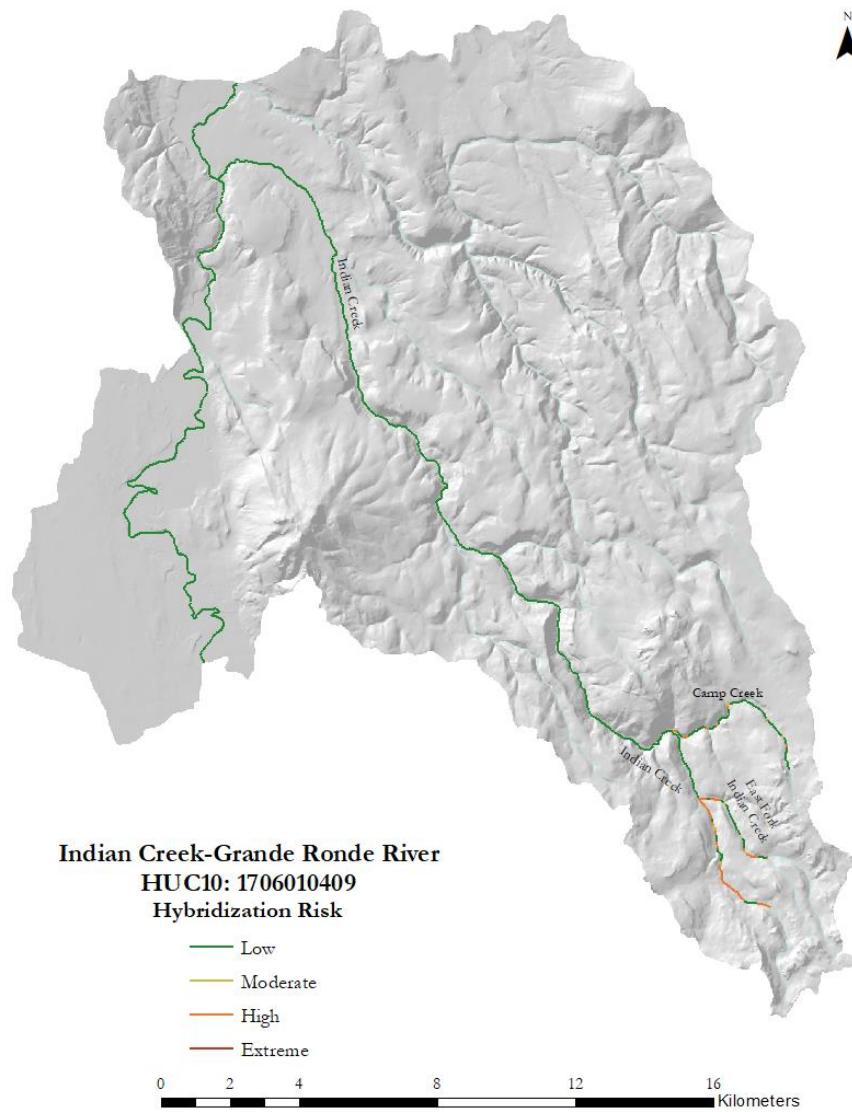



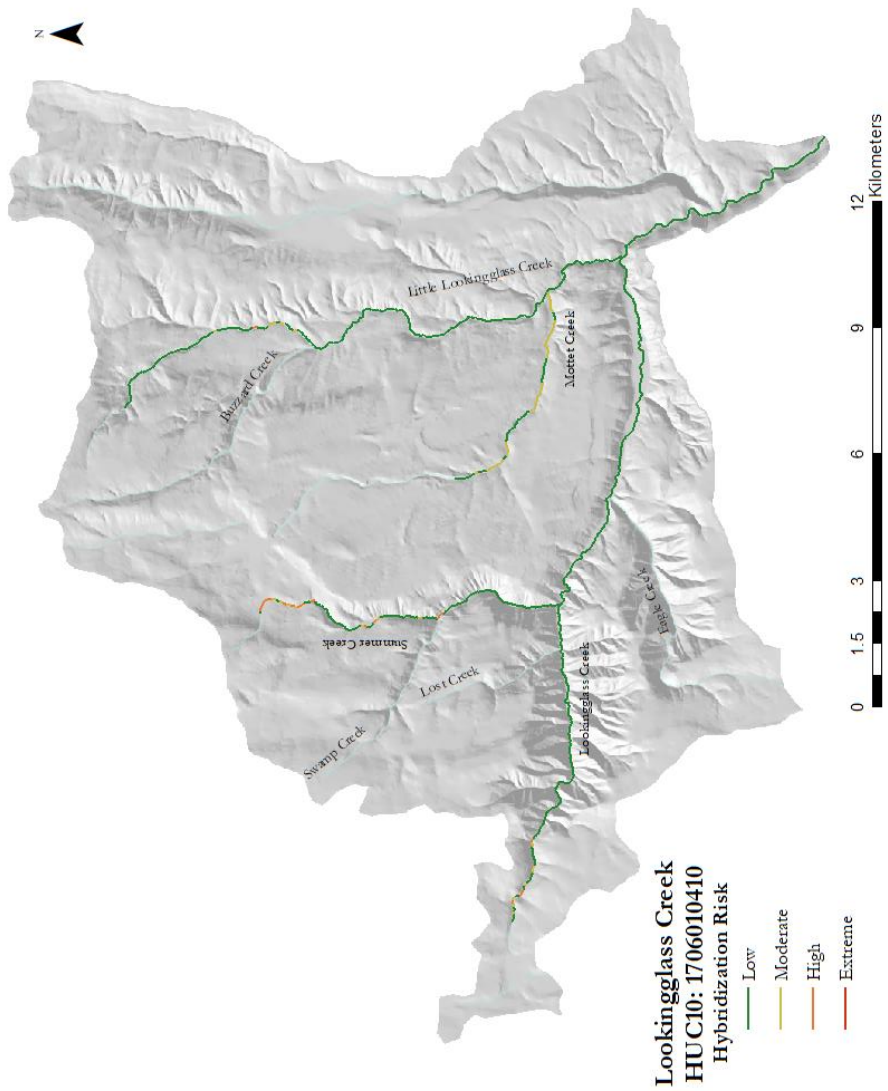

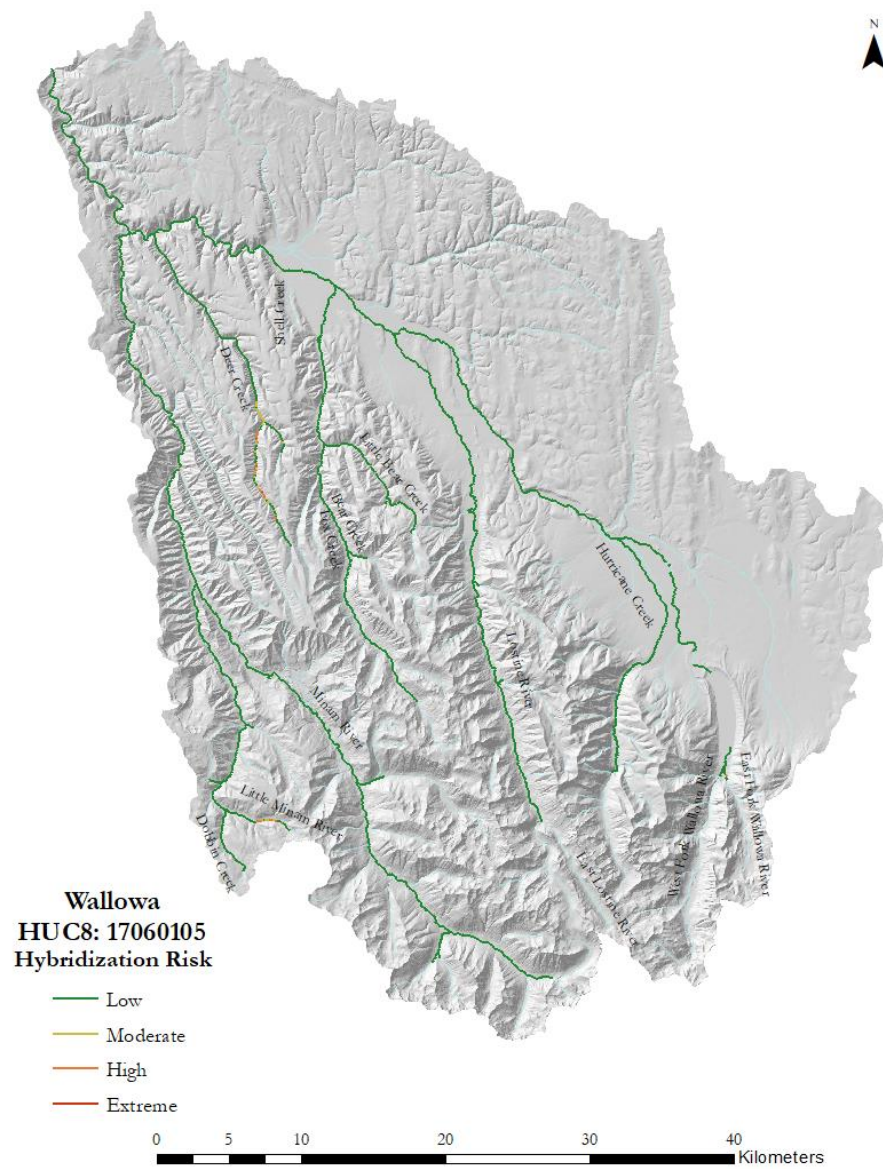



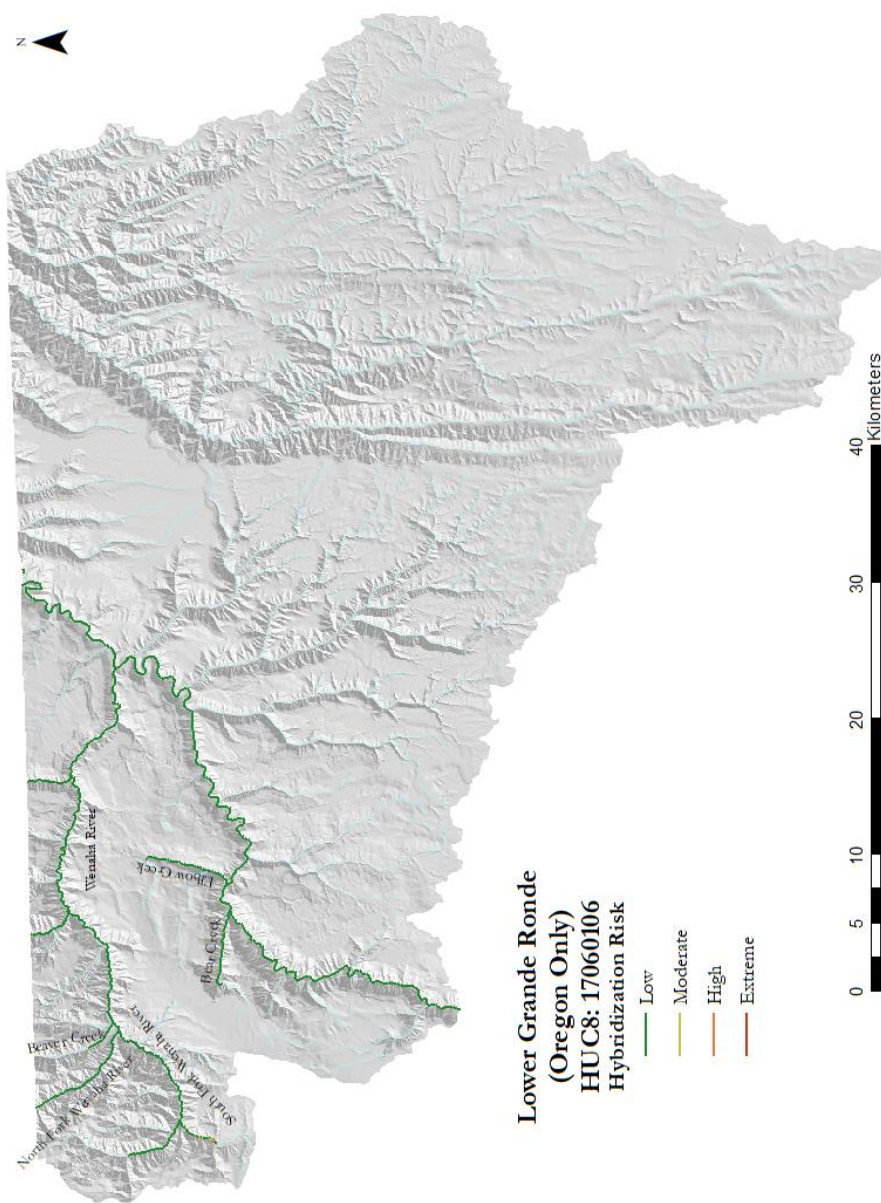

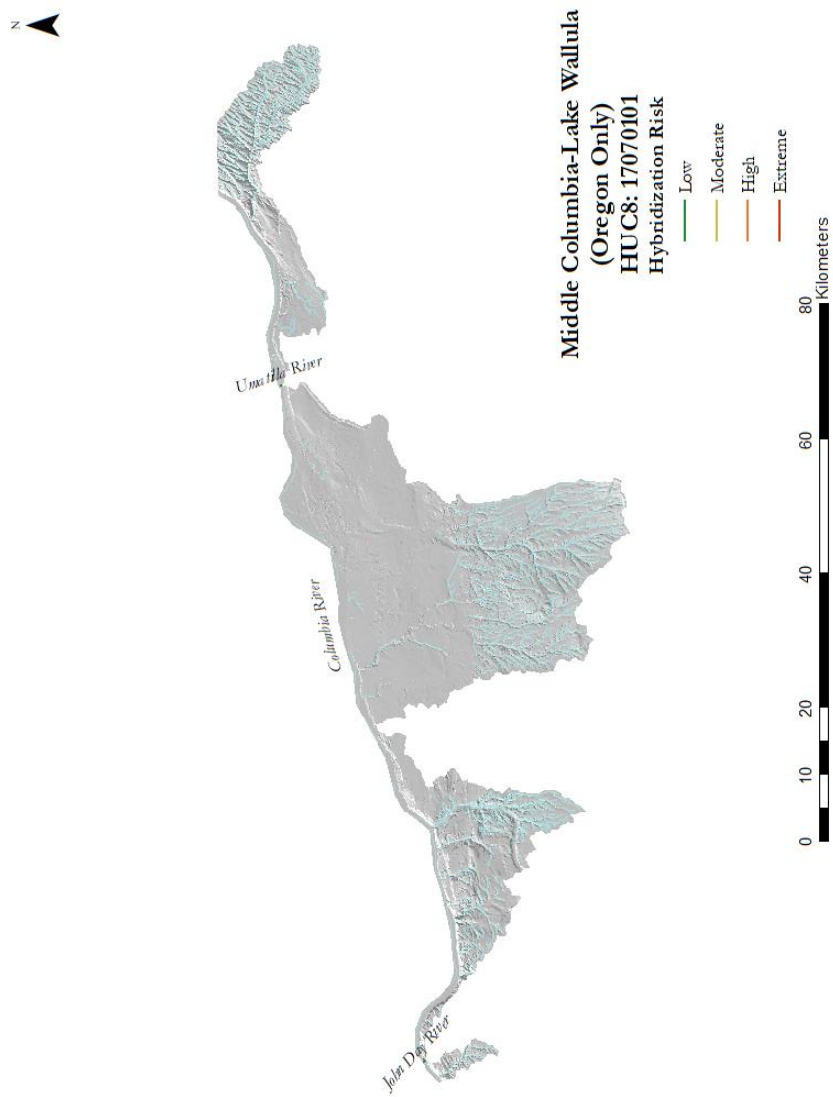

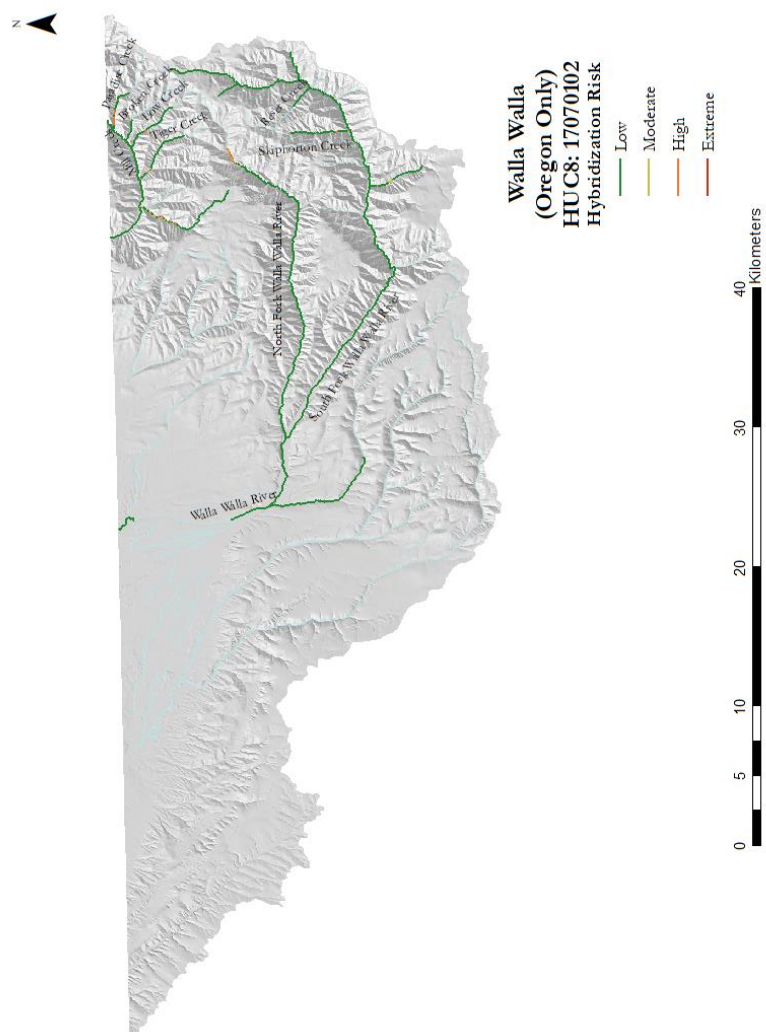

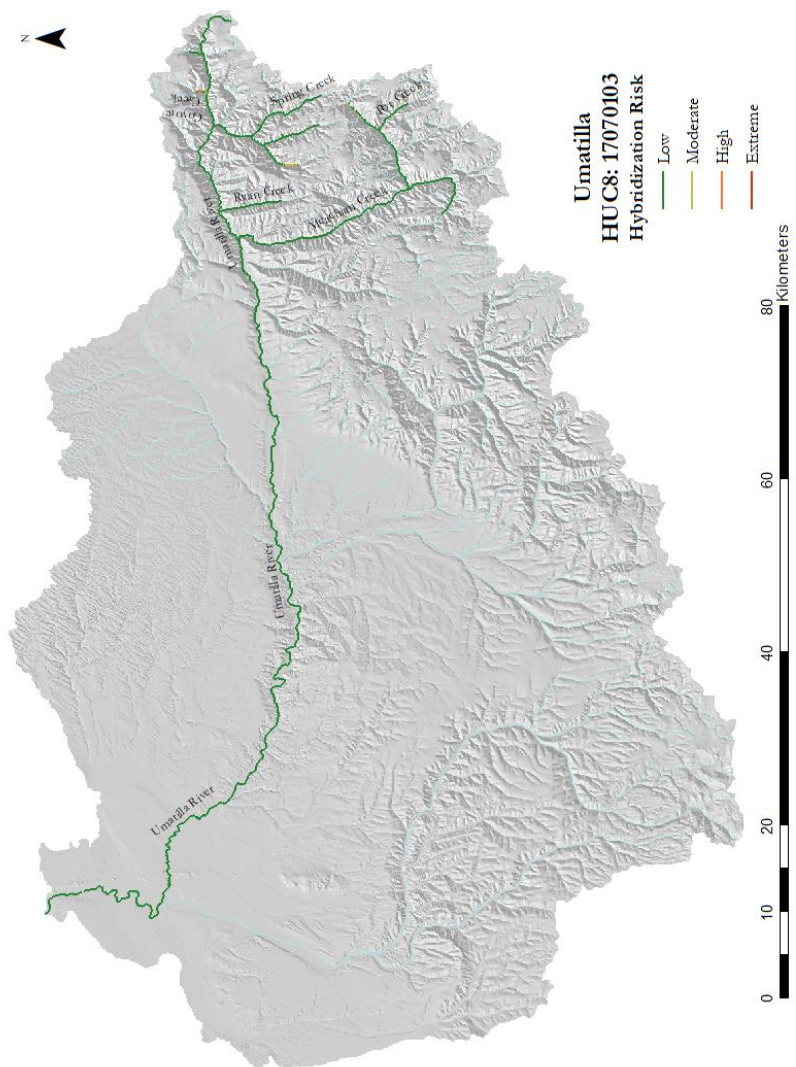

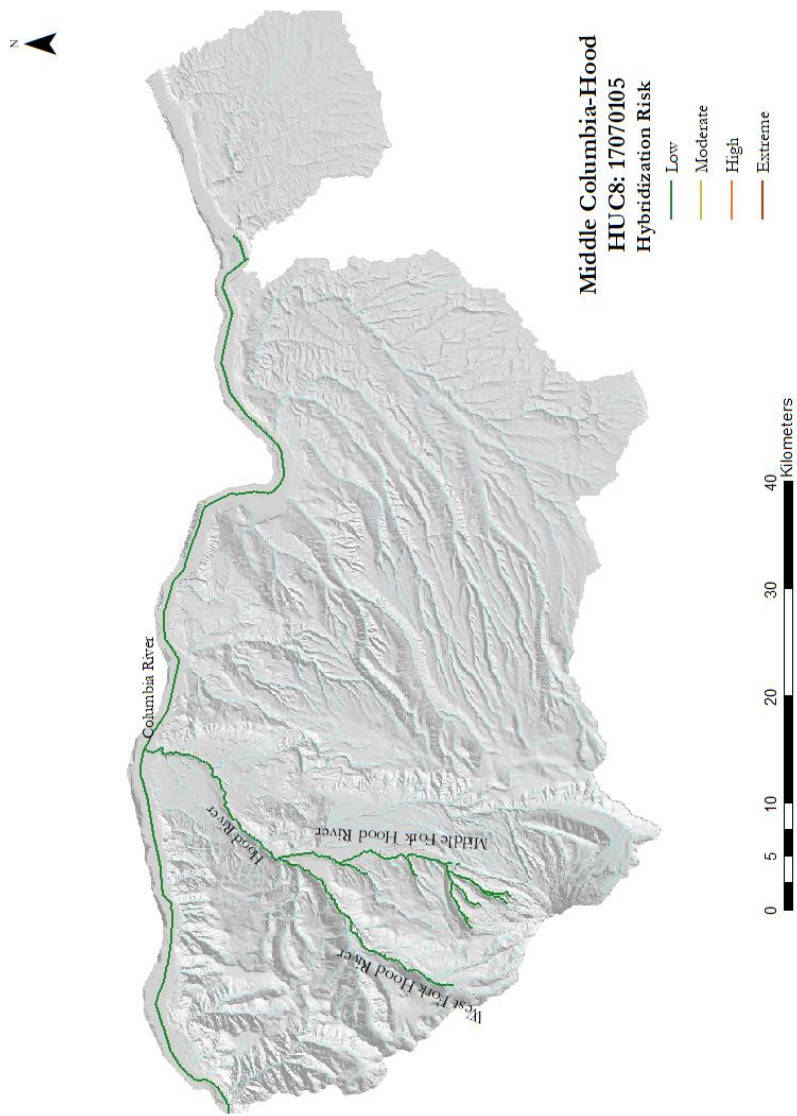



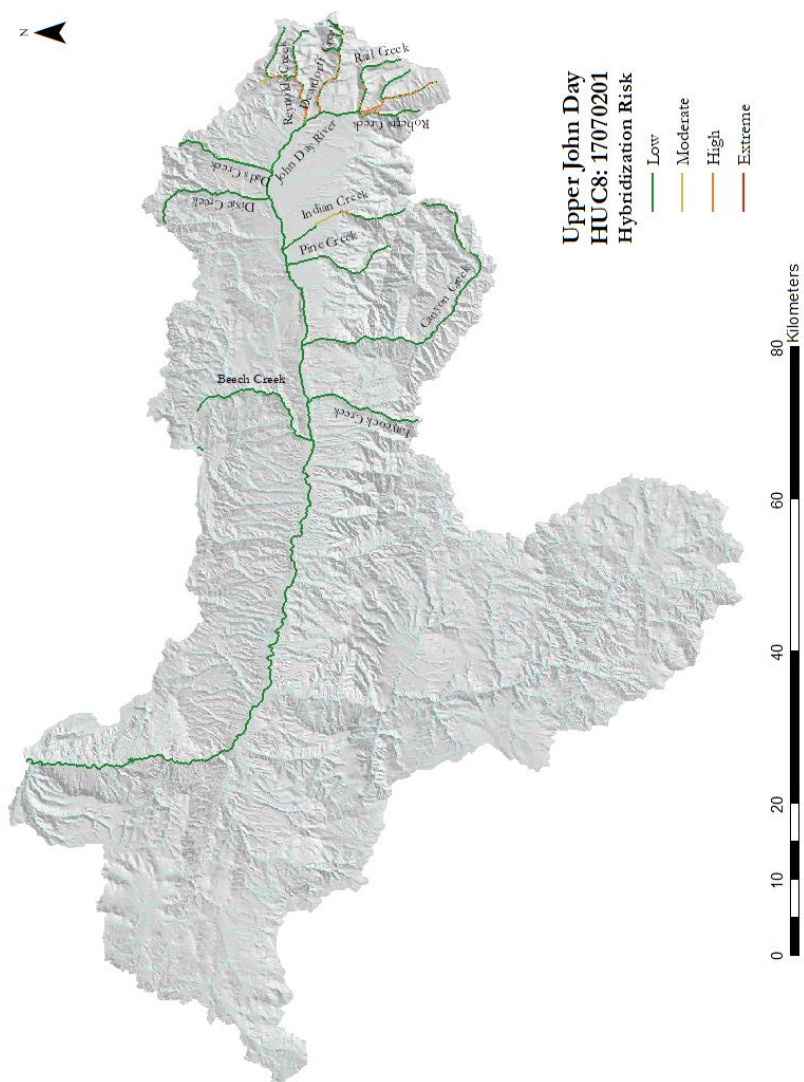

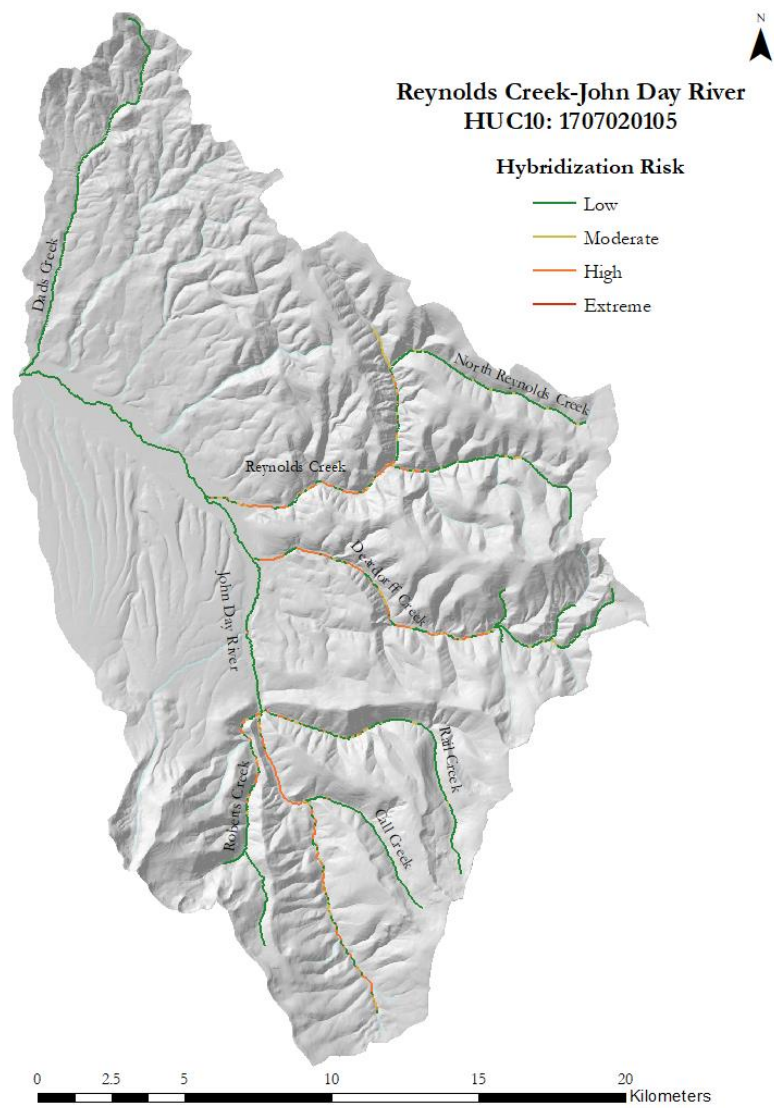

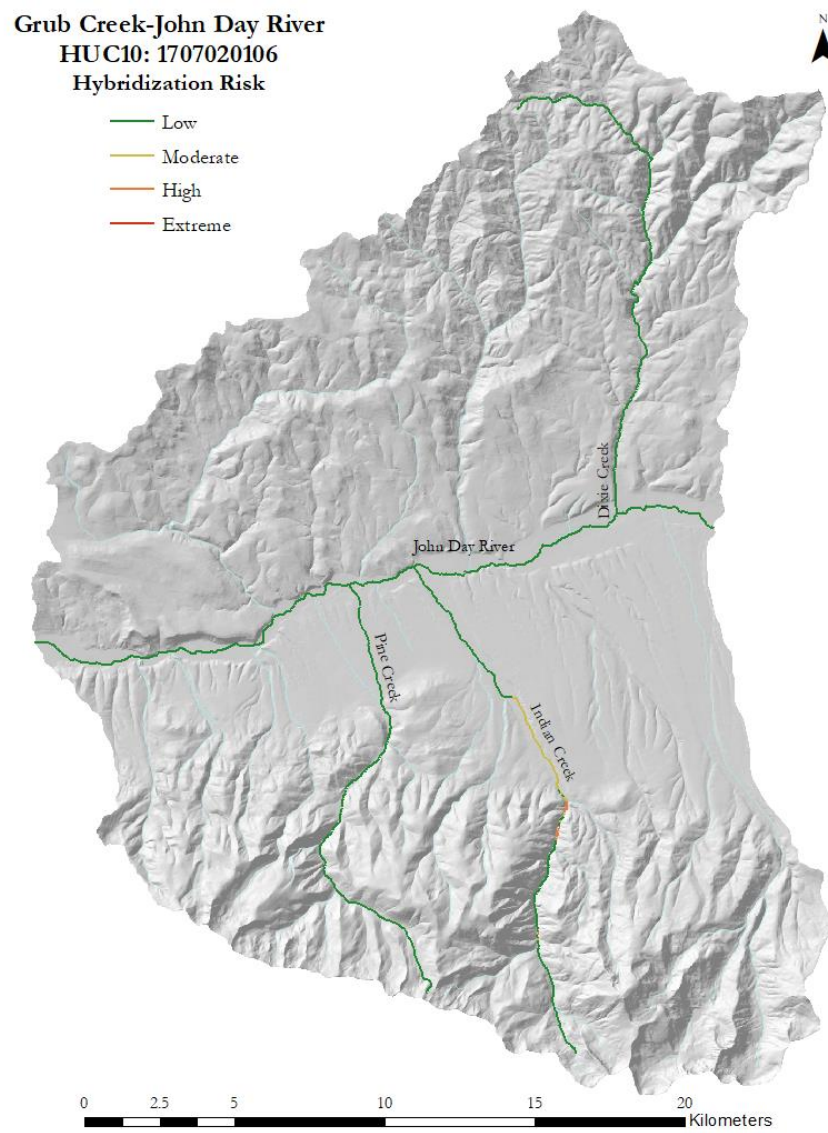



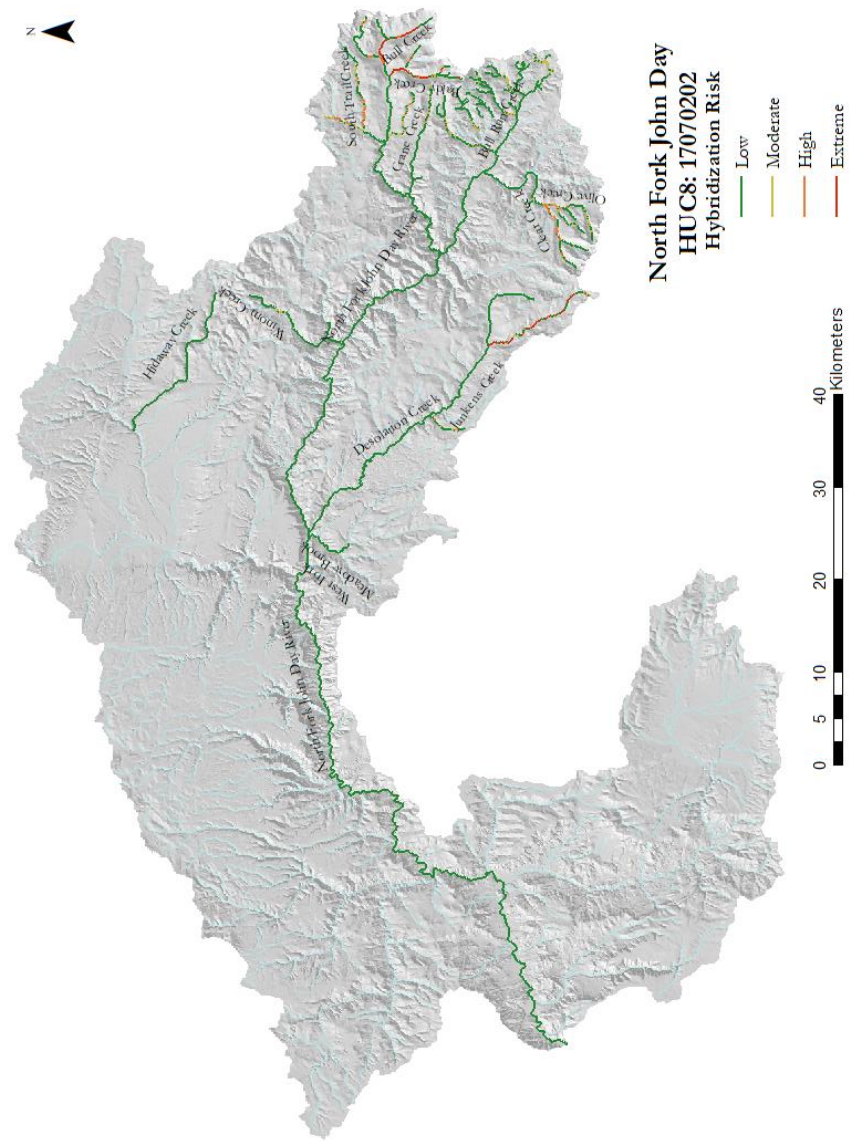

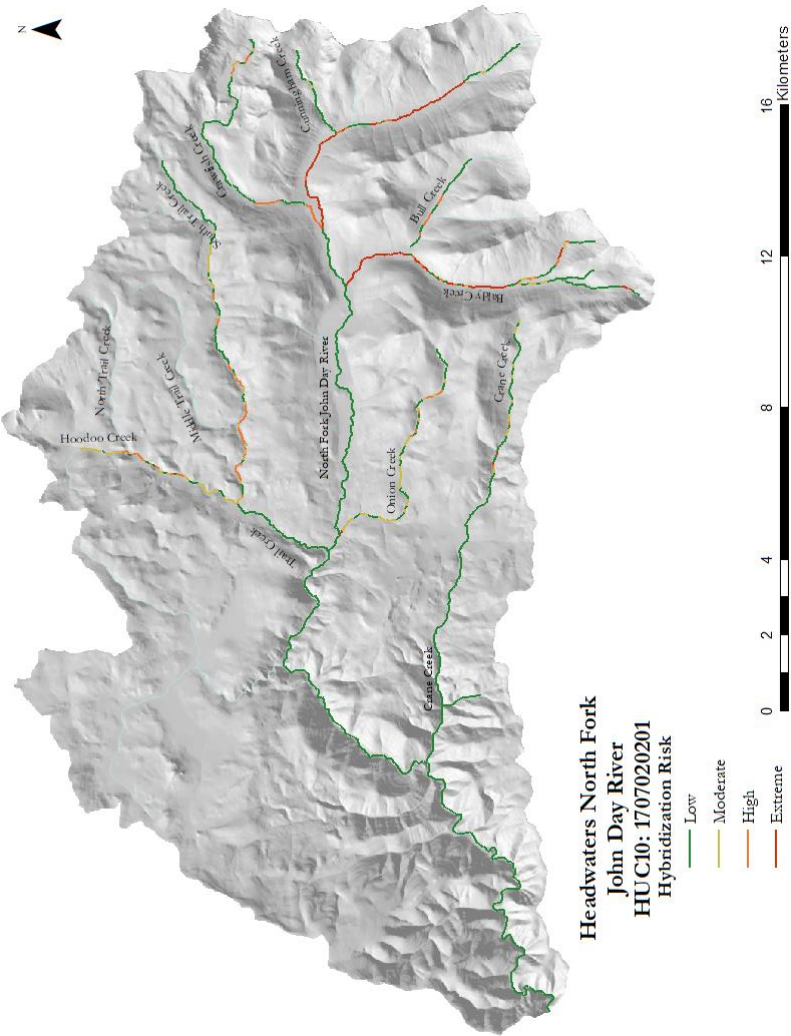

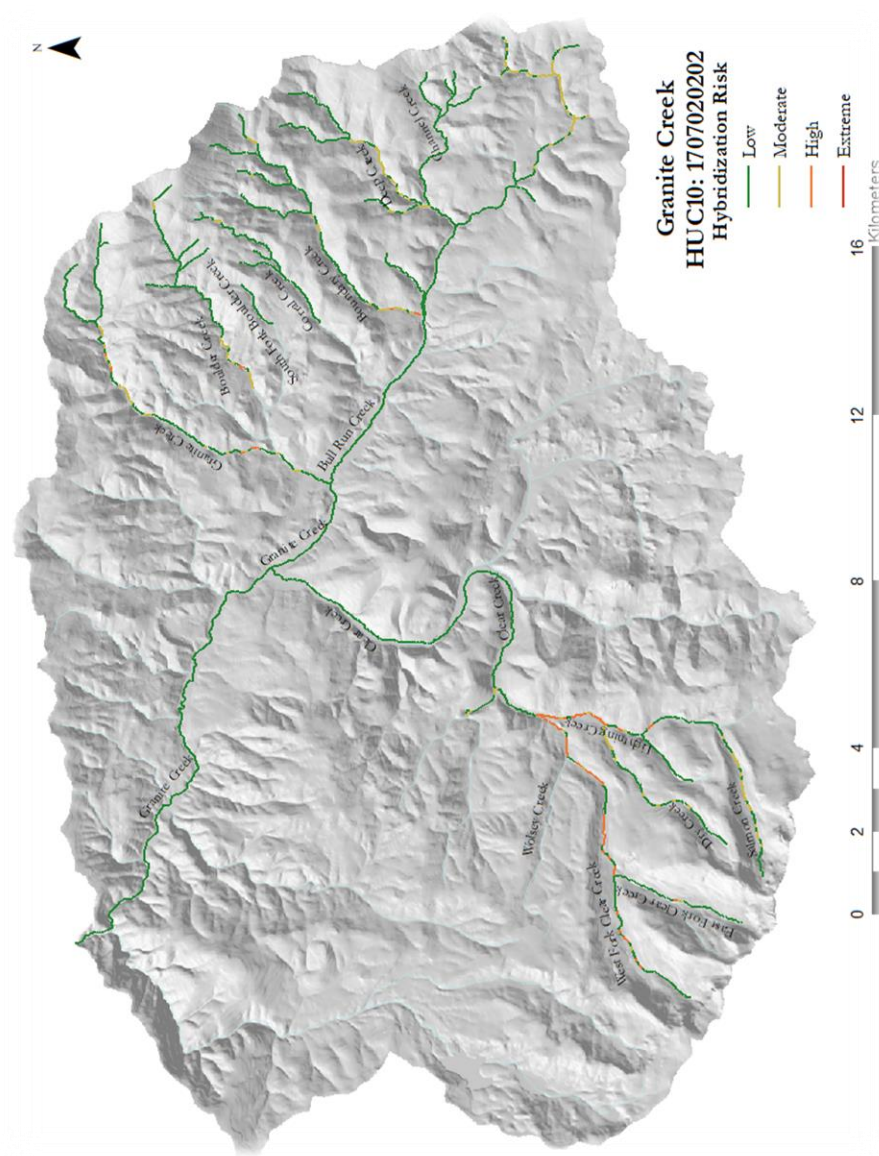

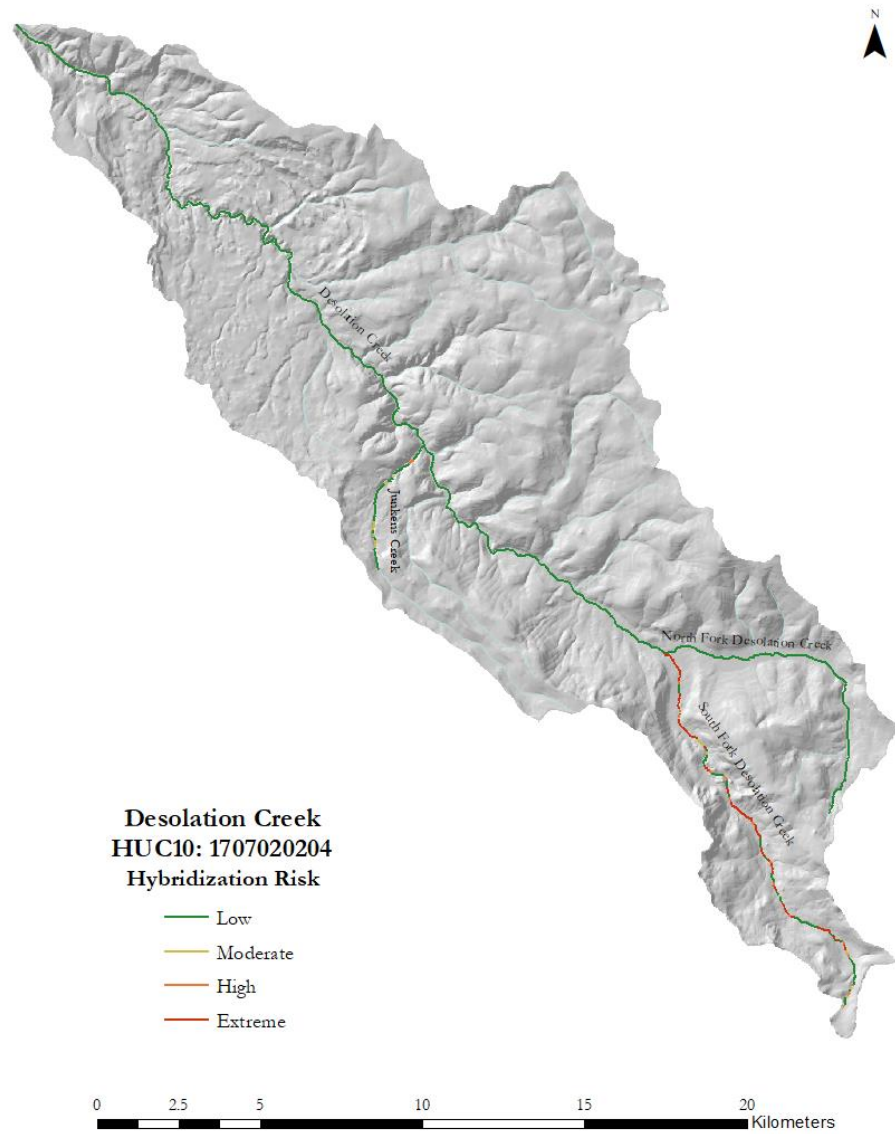

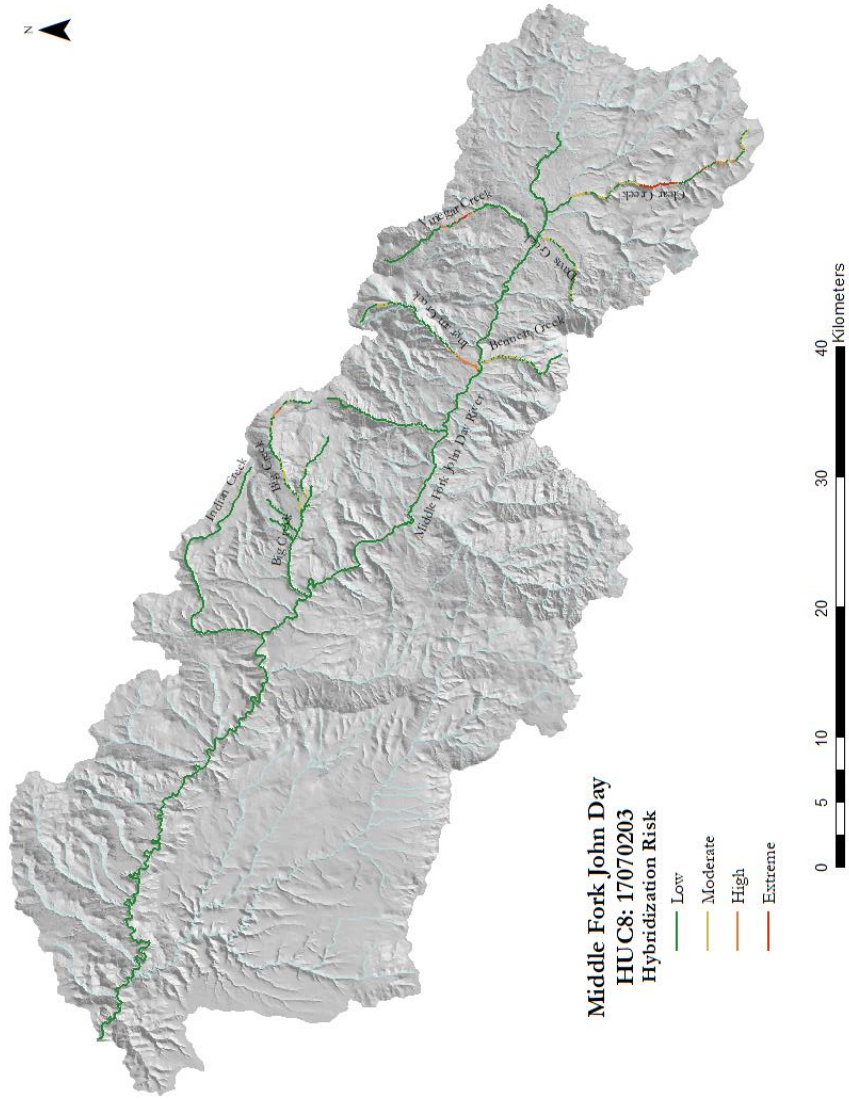



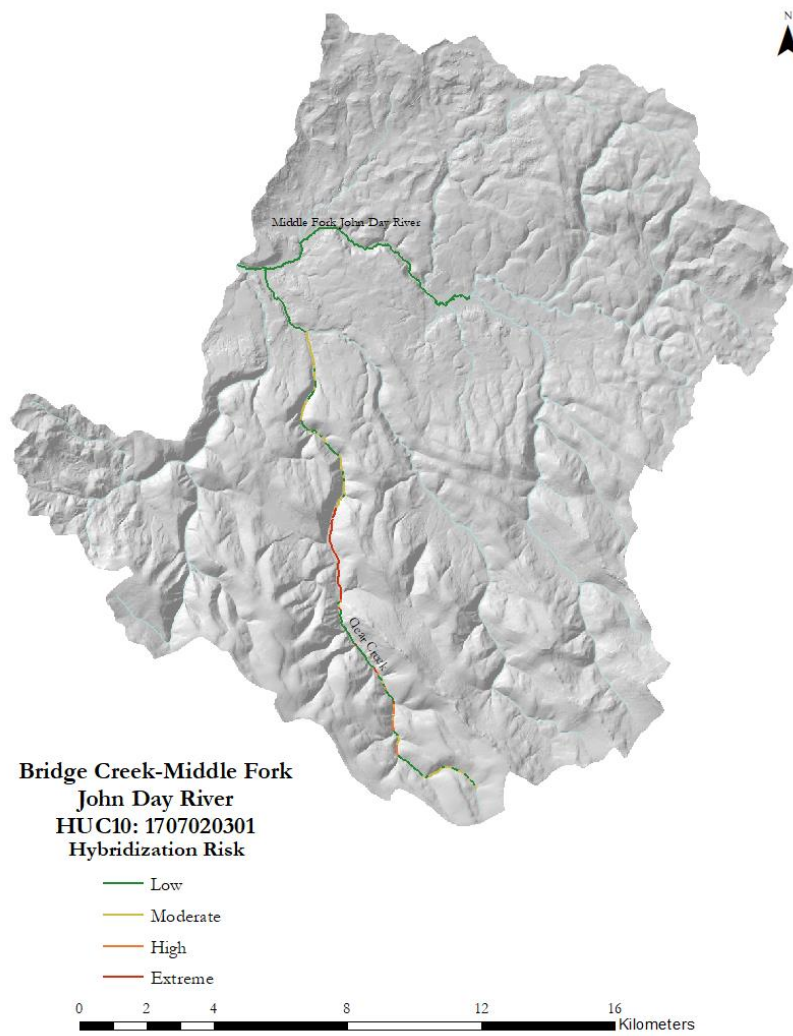

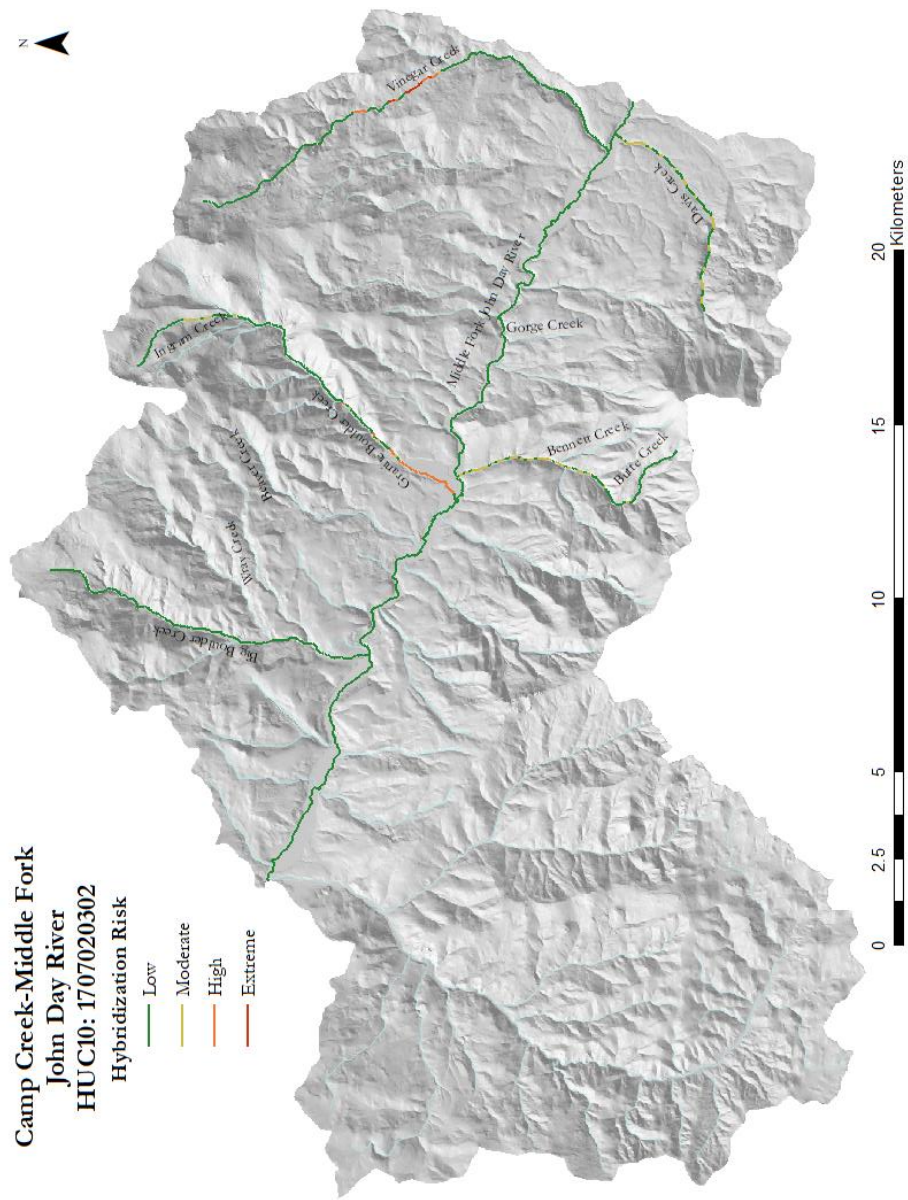

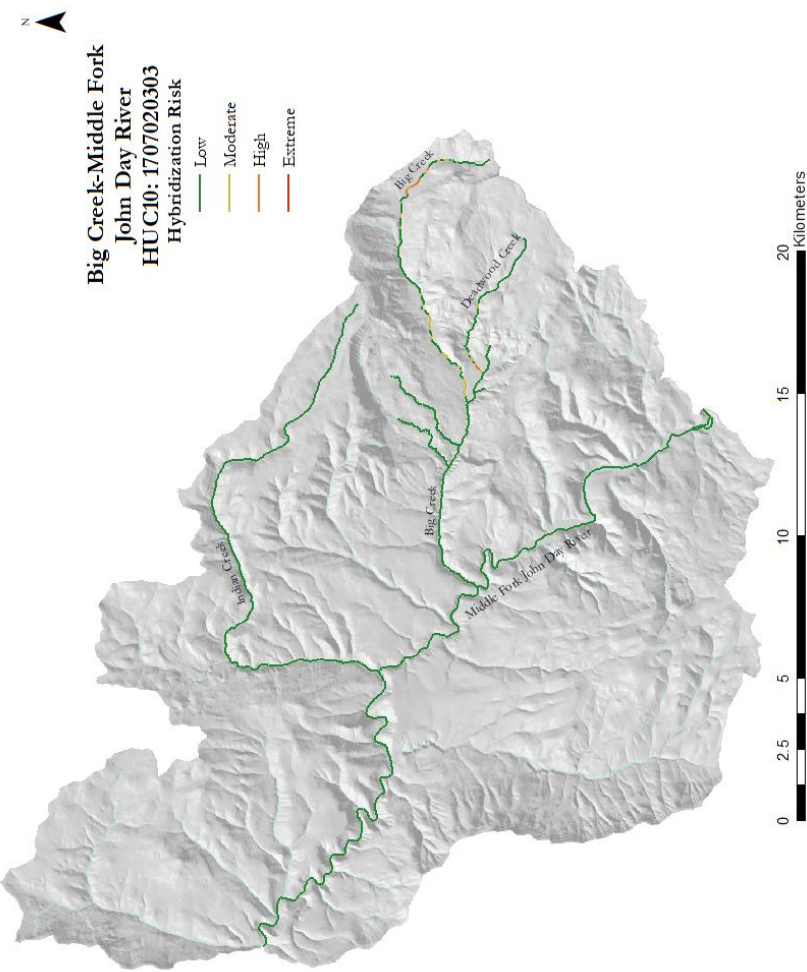



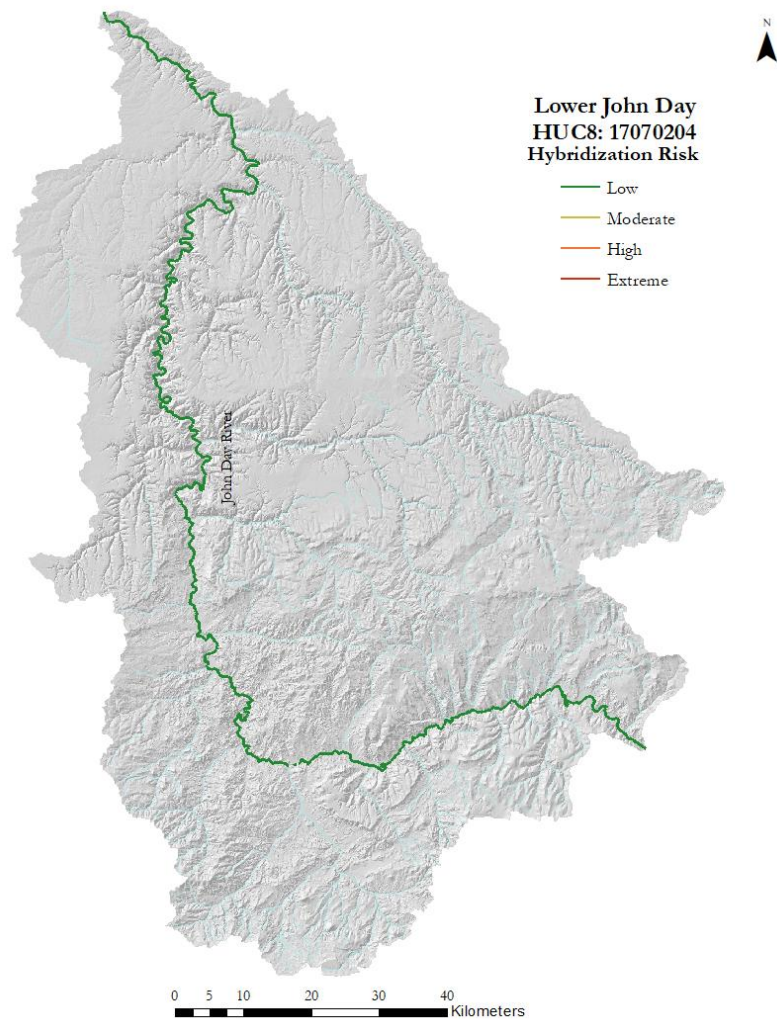

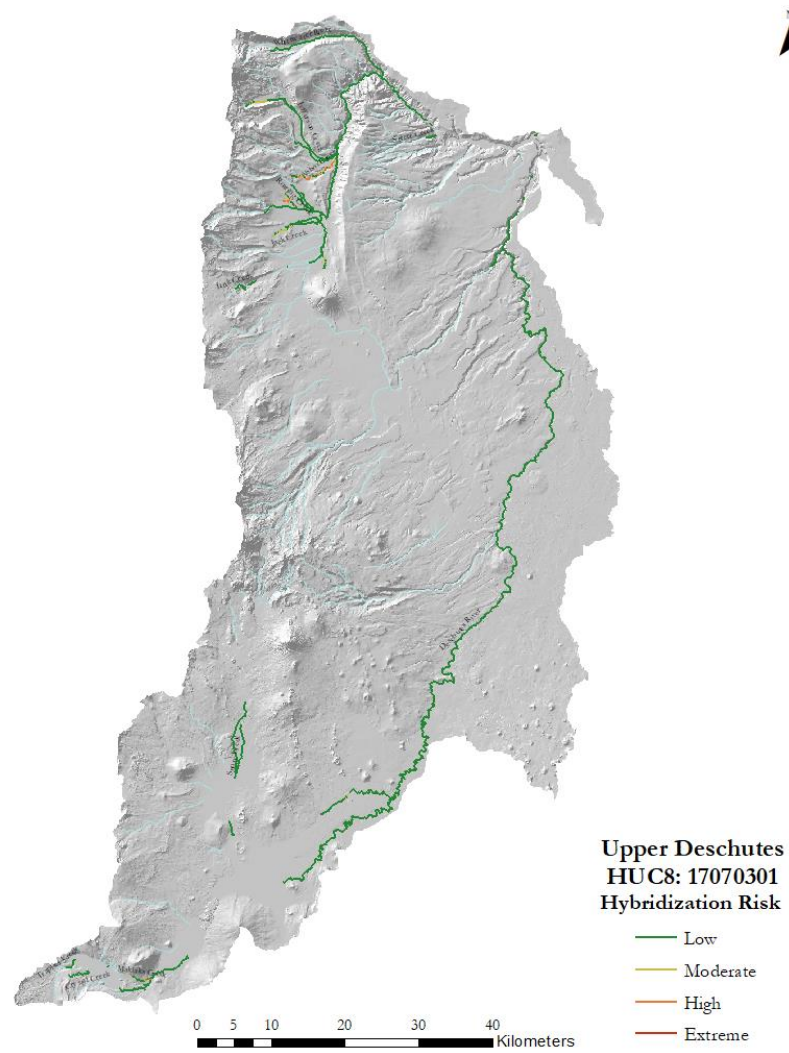

Upper Metolius River  
HUC10: 1707020301  
Hybridization Risk

- Low
- Moderate
- High
- Extreme

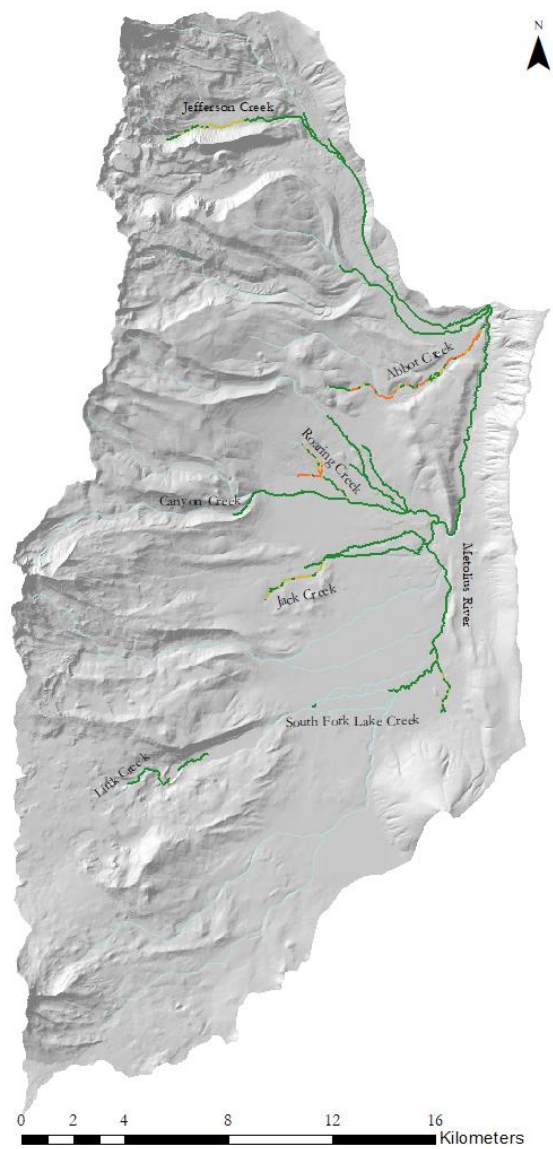

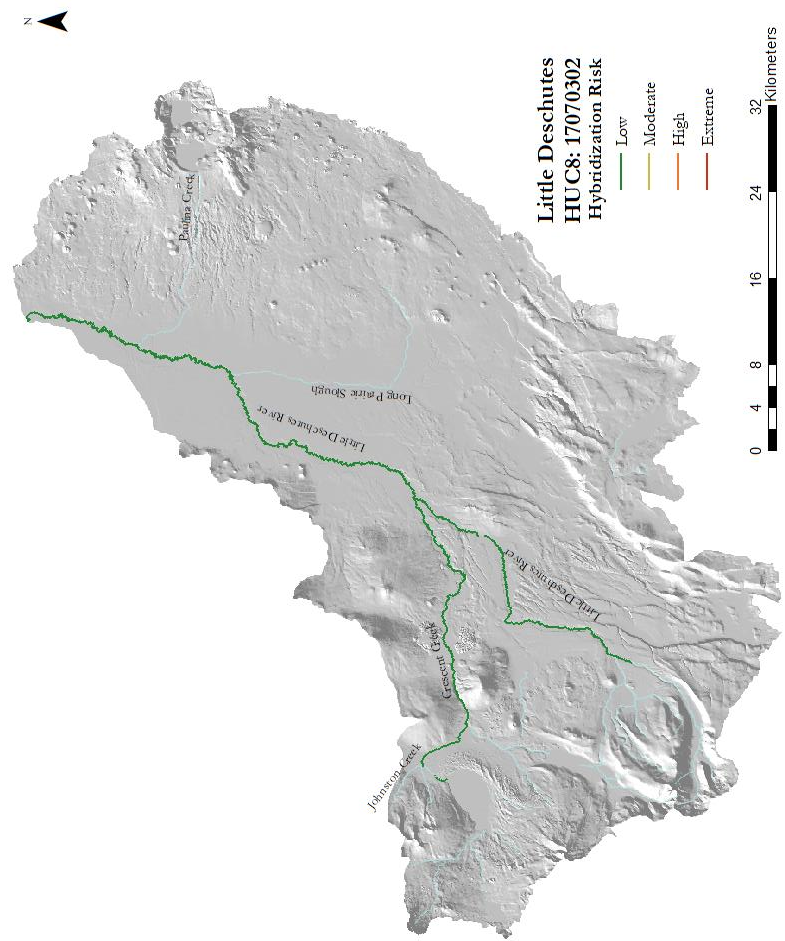

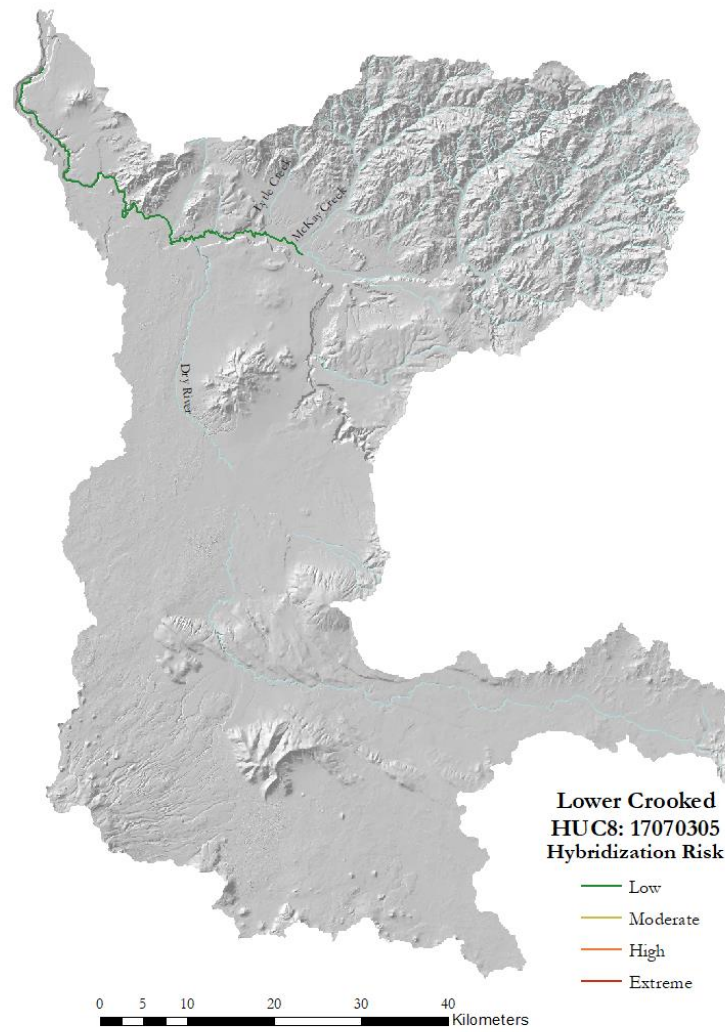



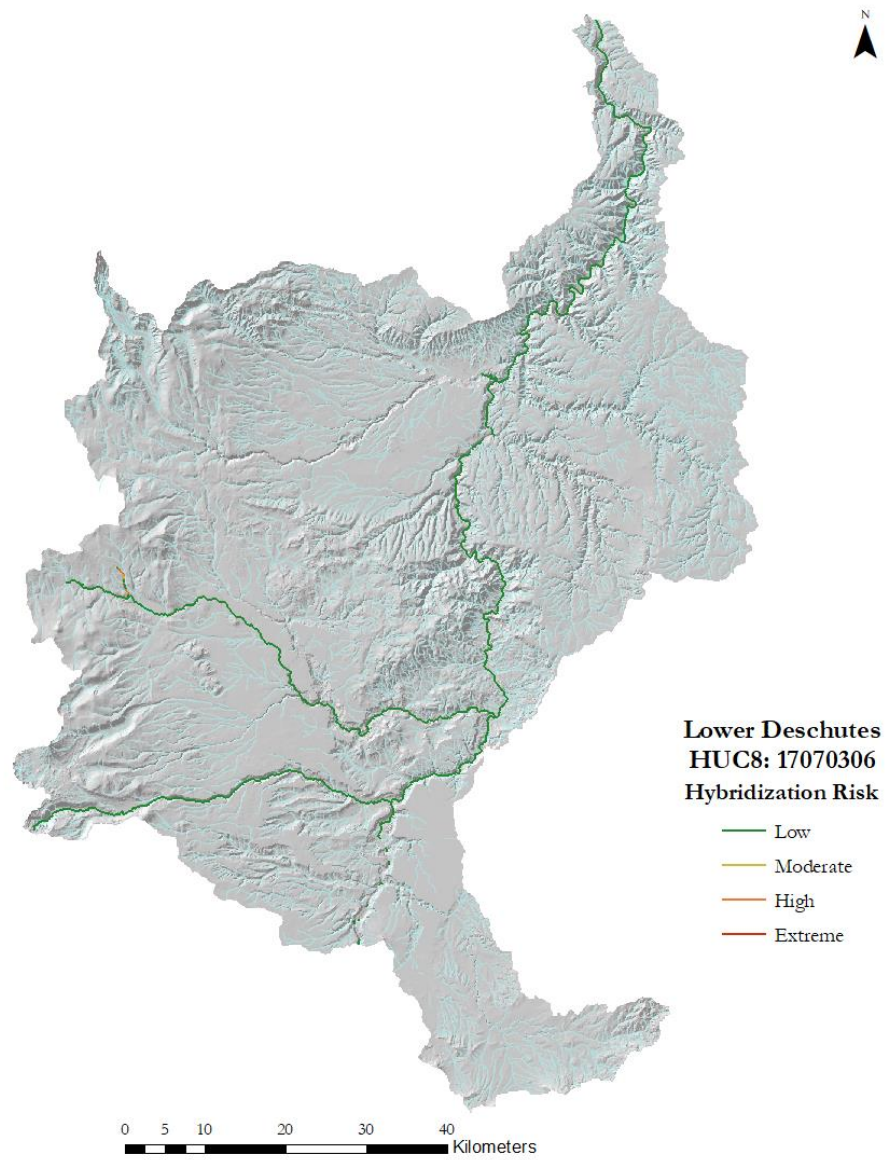

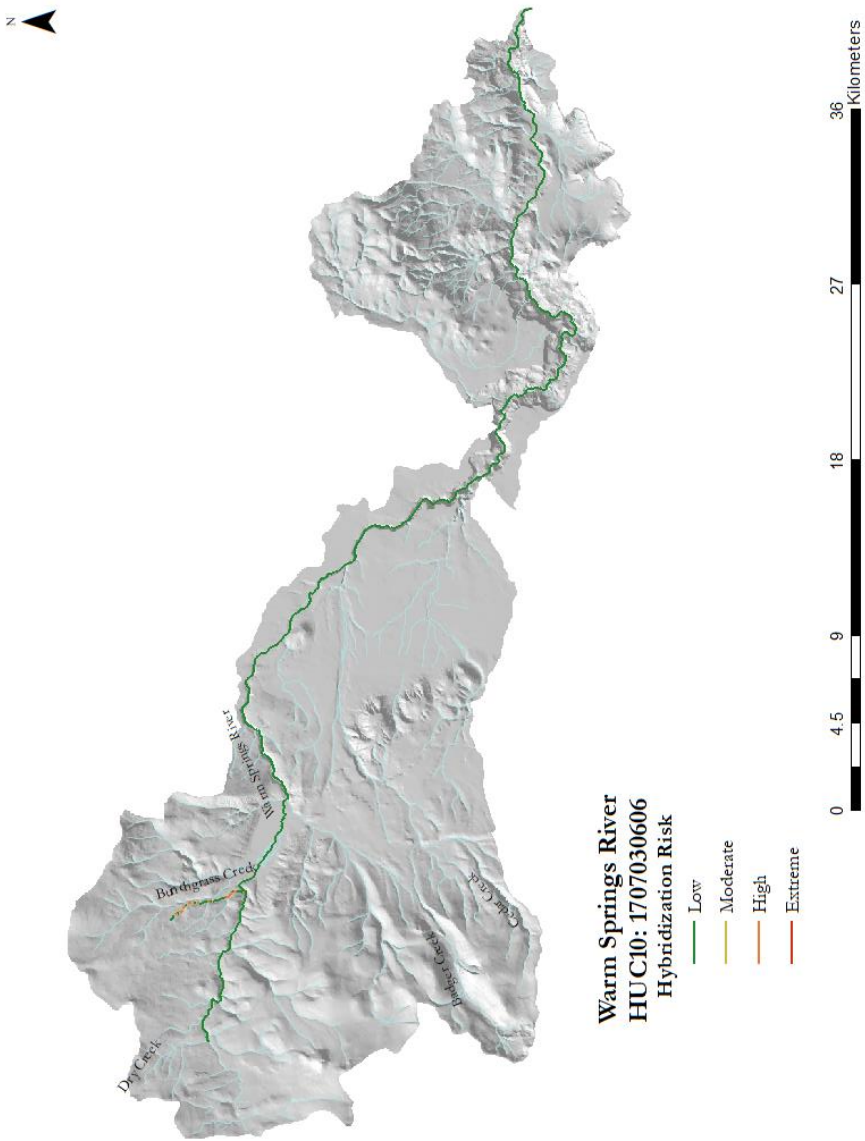



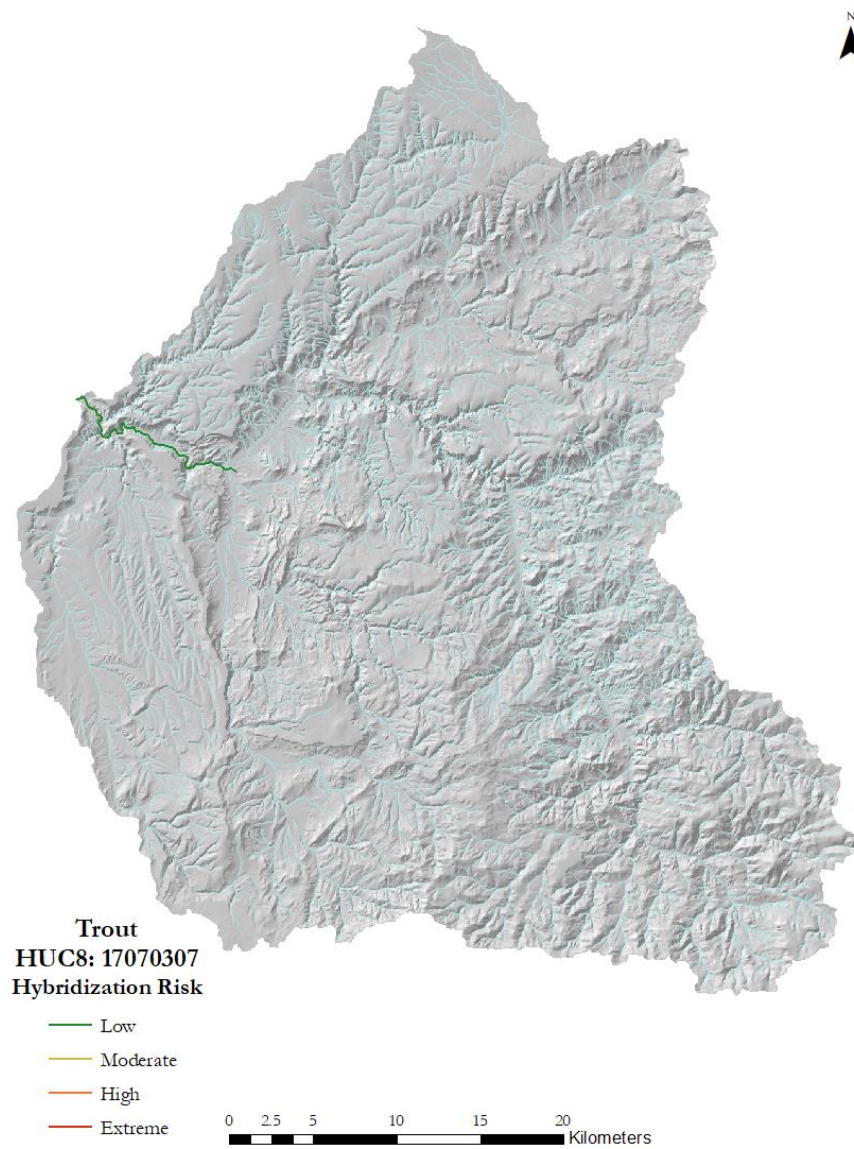

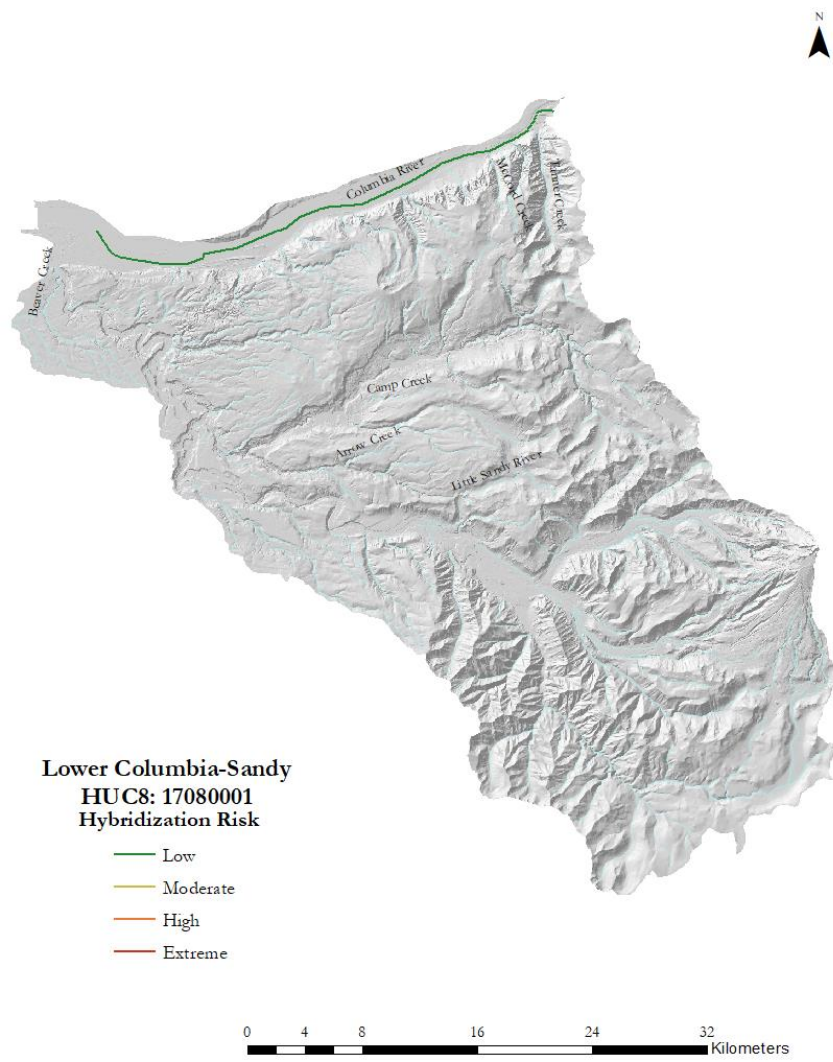

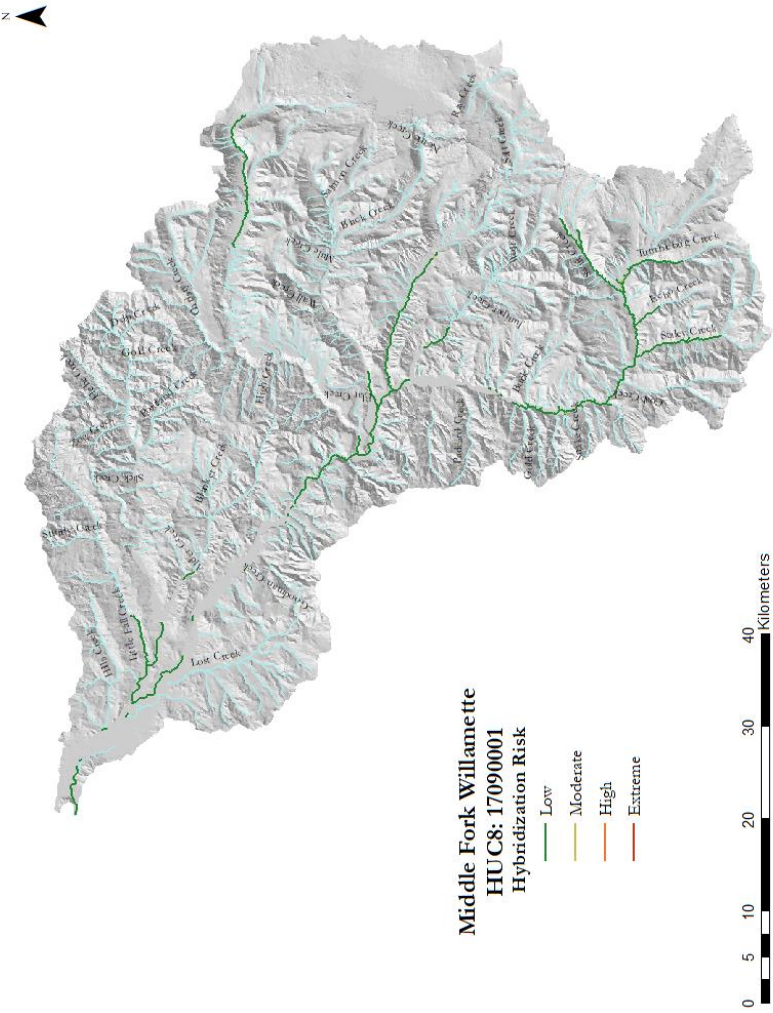

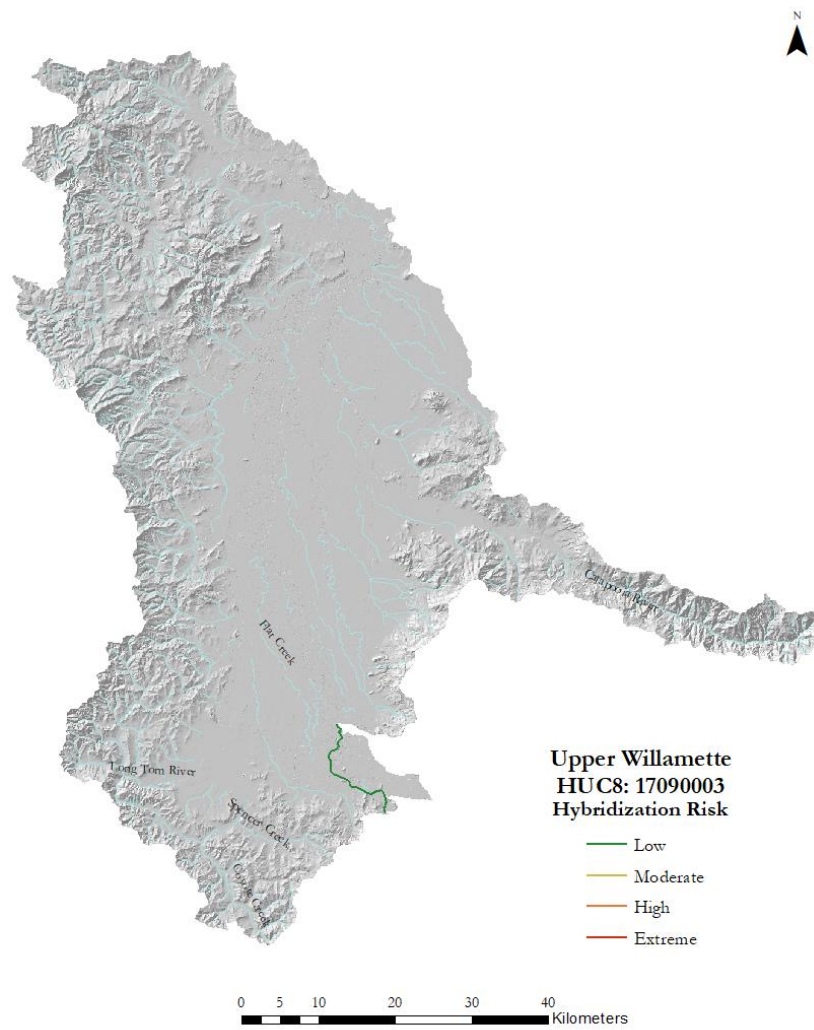

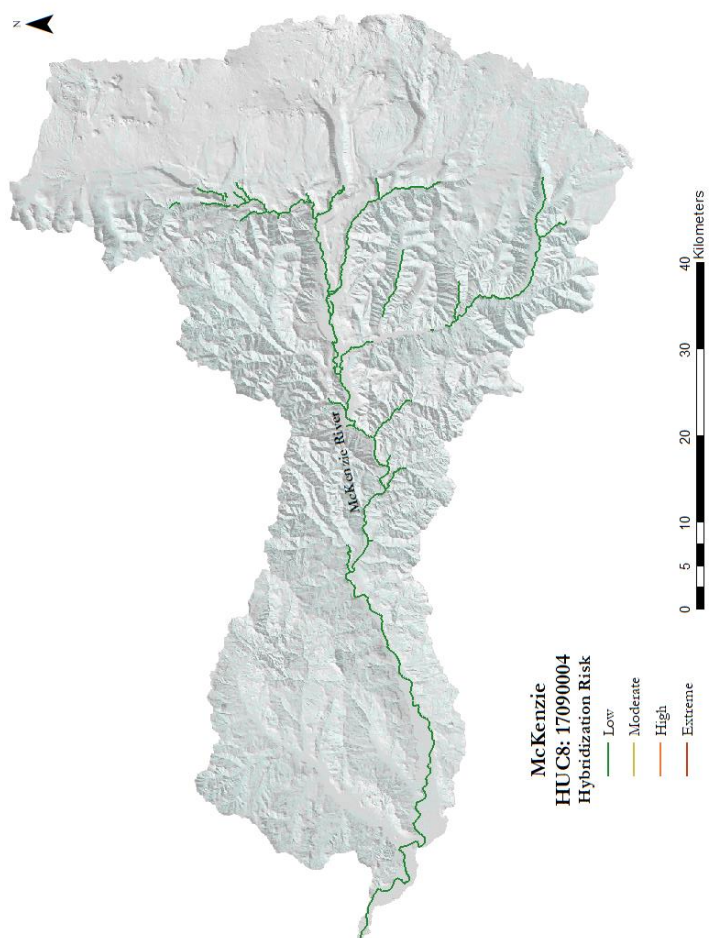



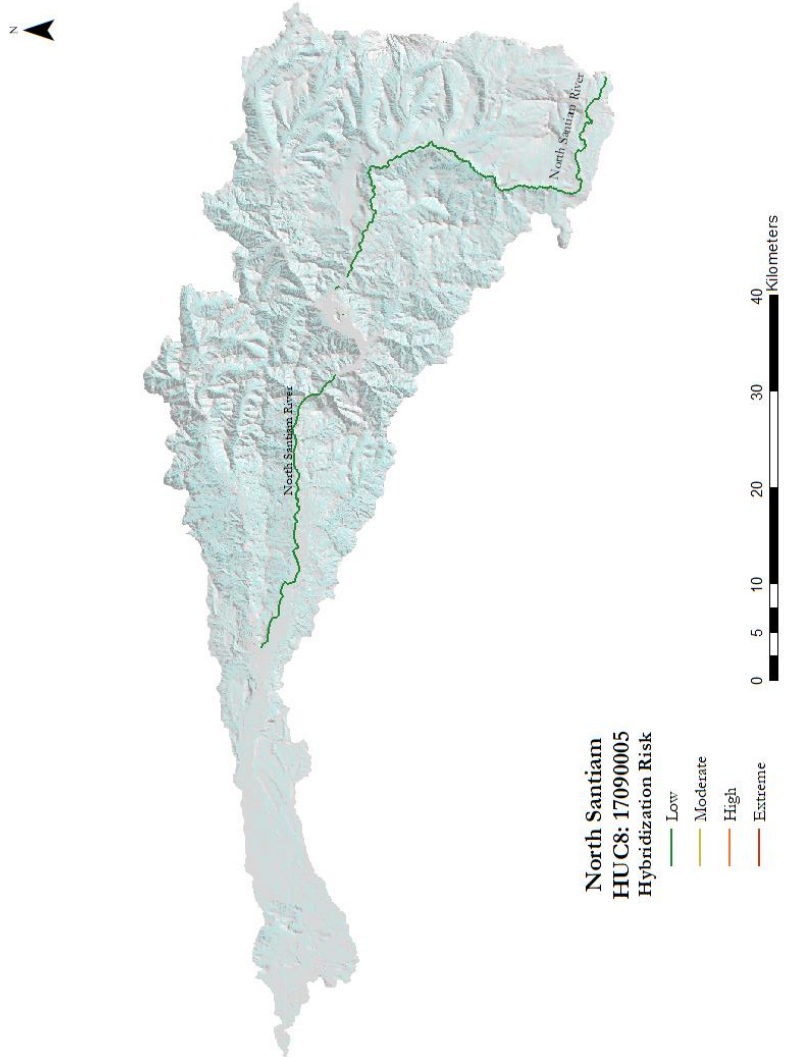

North Santiam  
HUC8: 17090005  
Hybridization Risk

- Low
- Moderate
- High
- Extreme

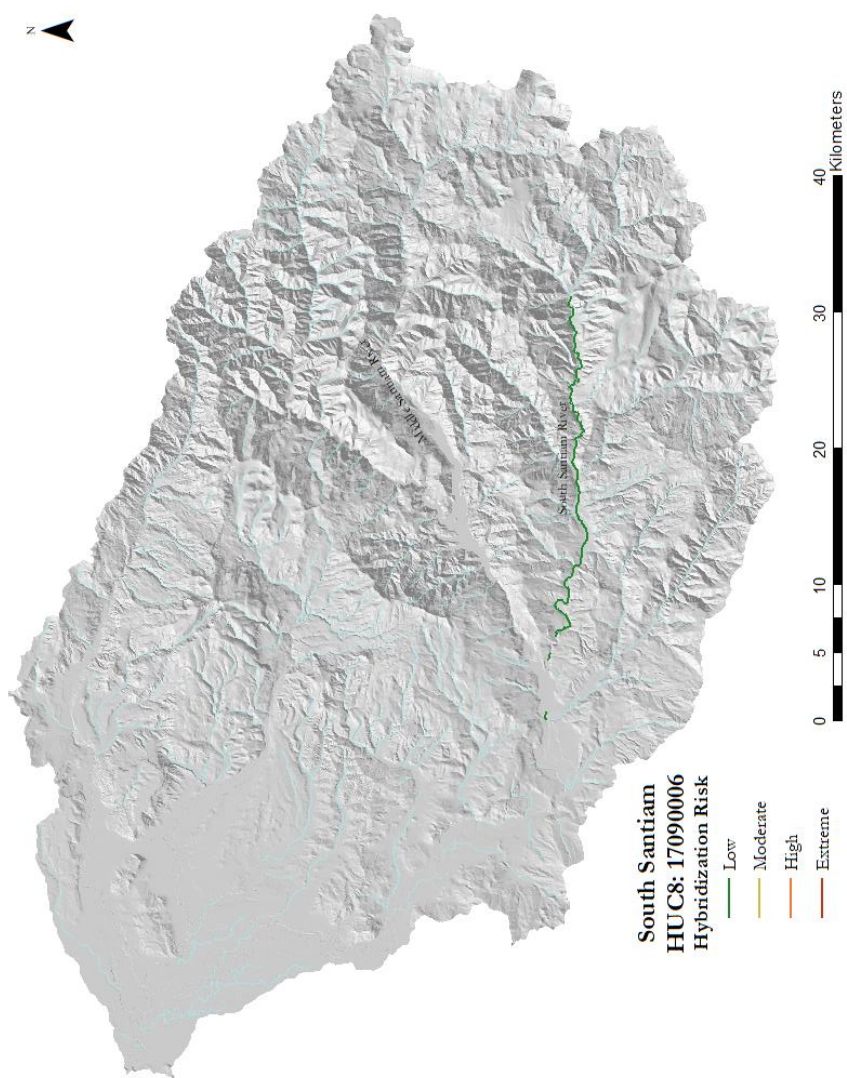



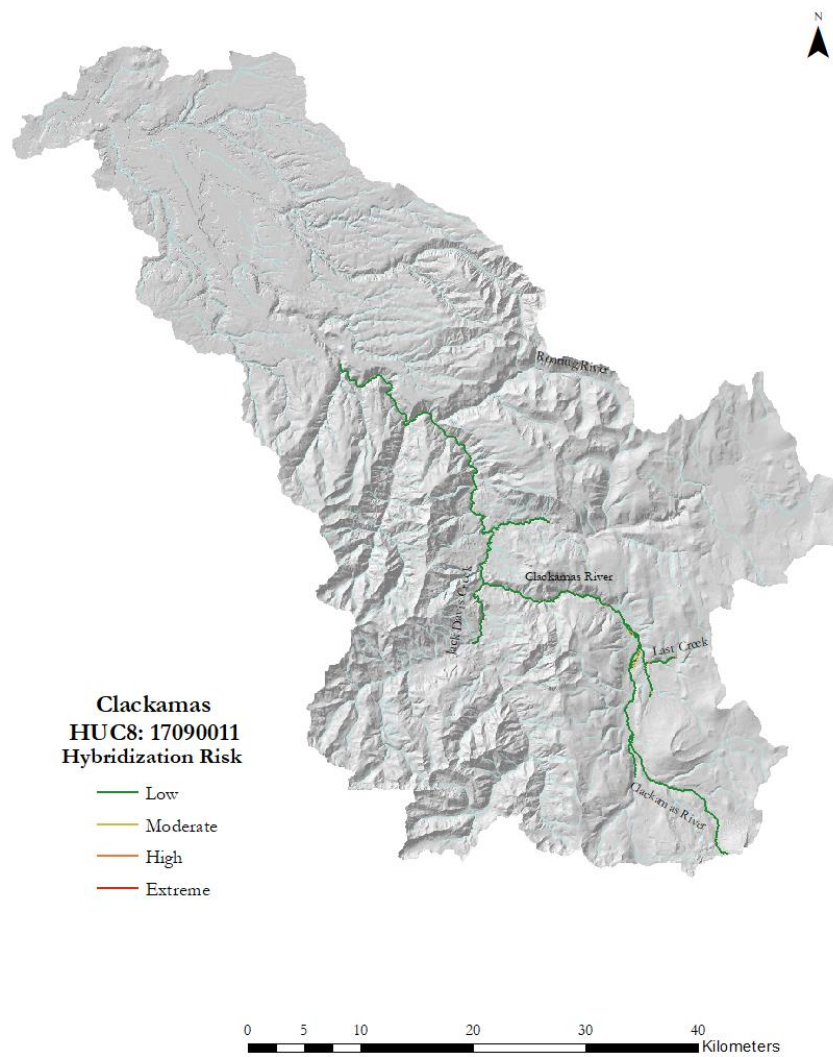

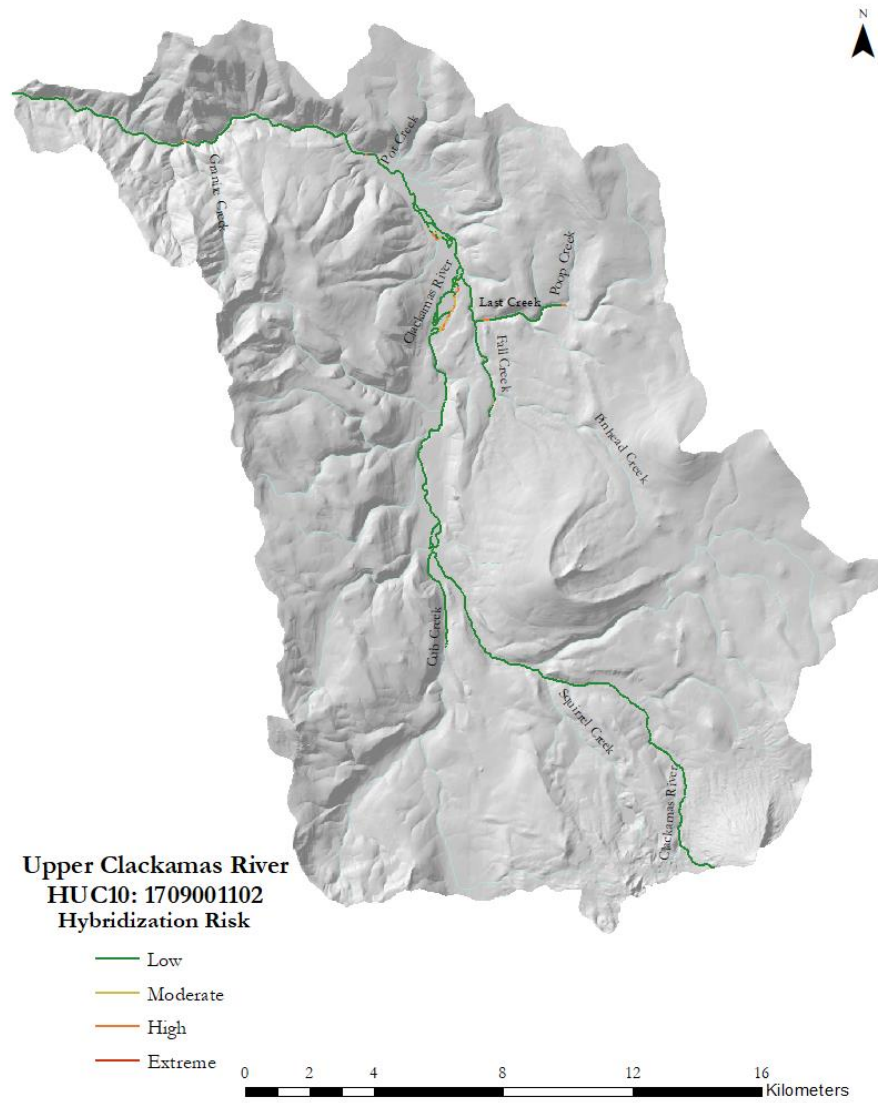

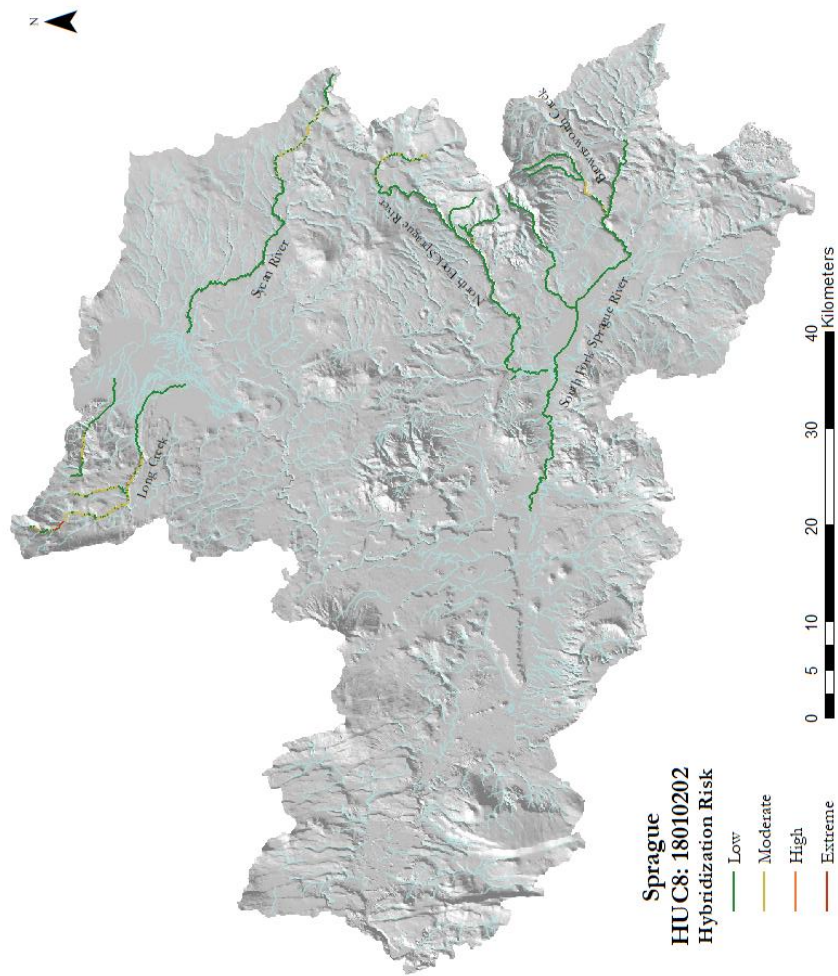

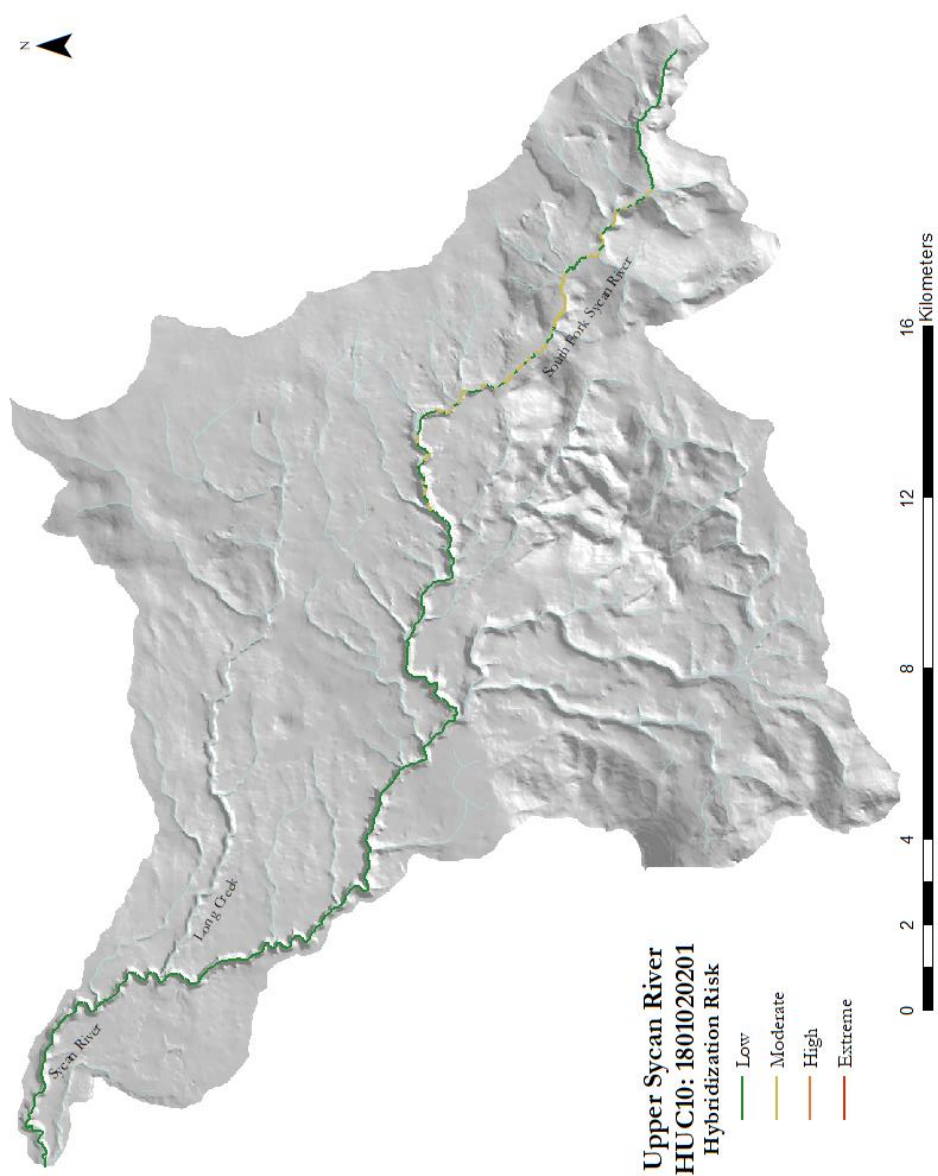

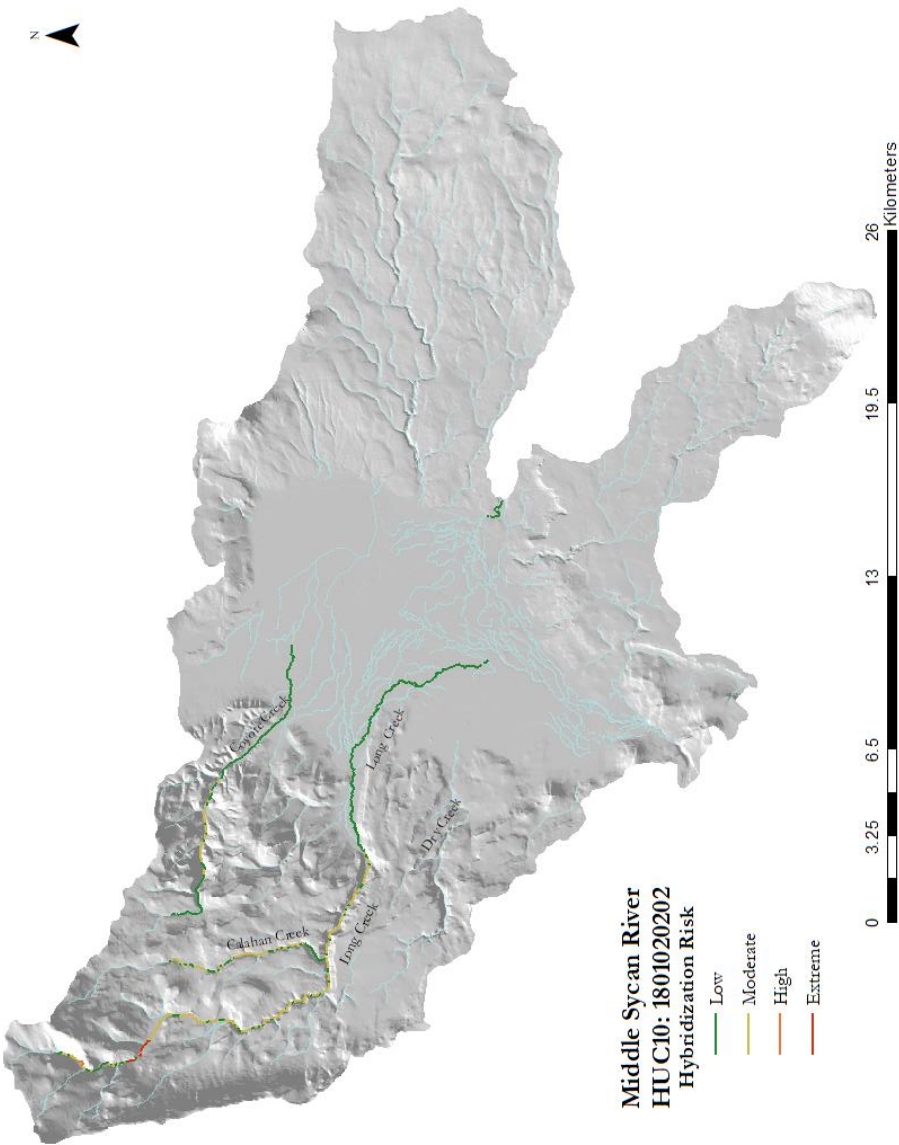



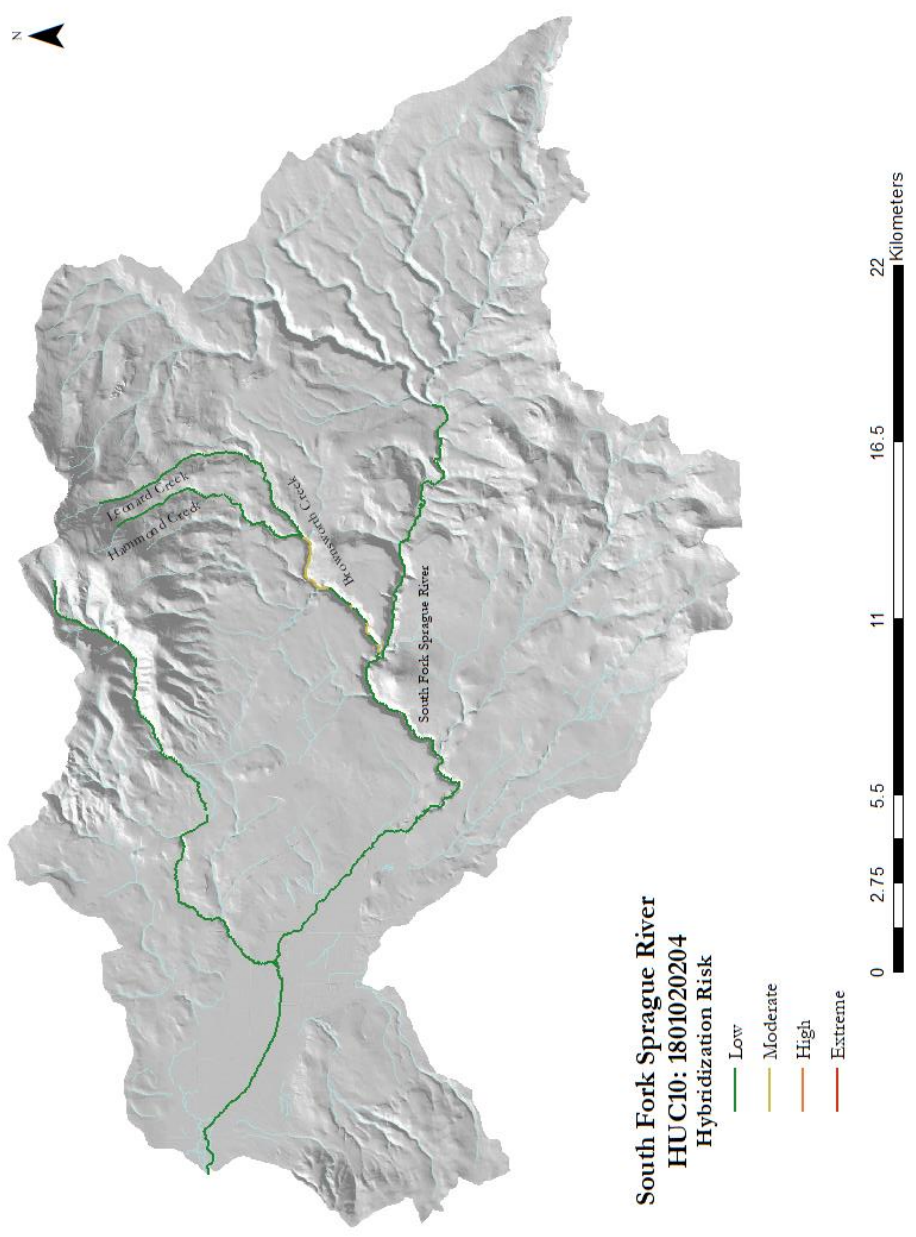

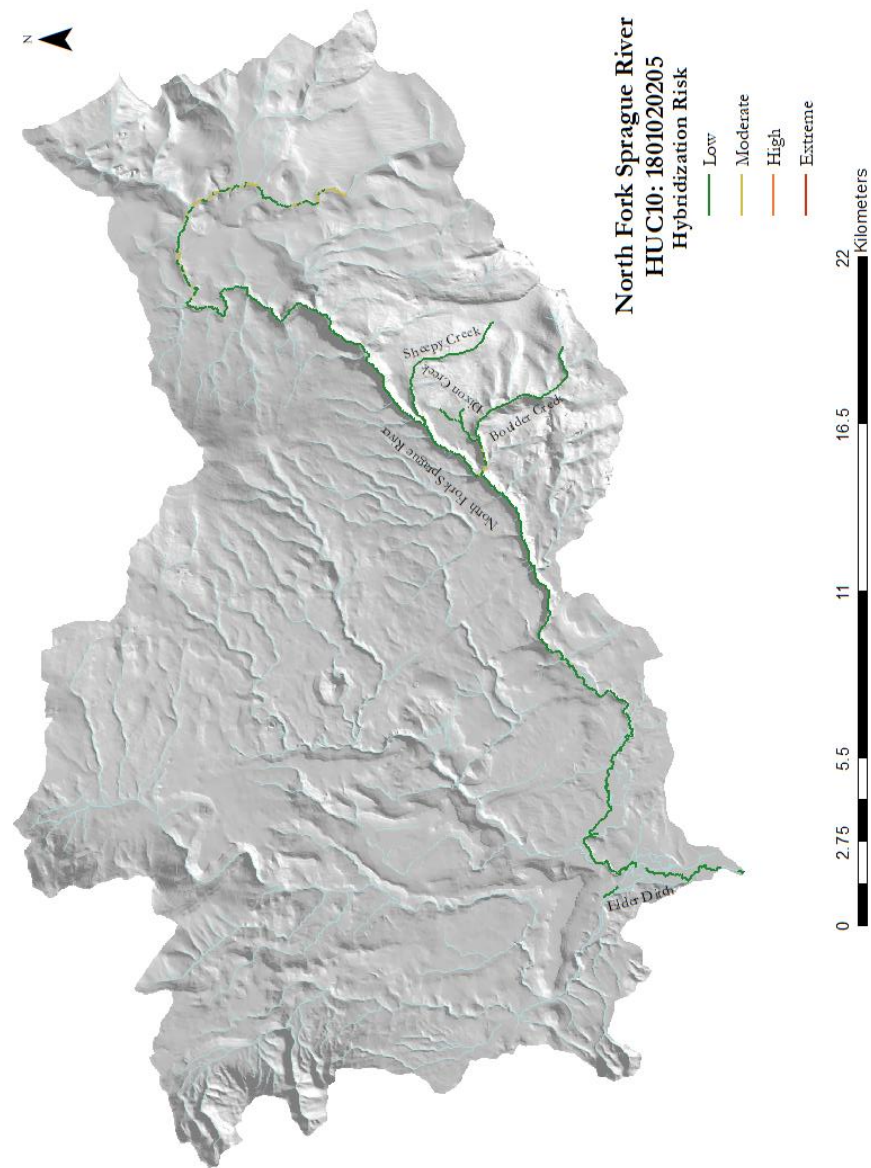



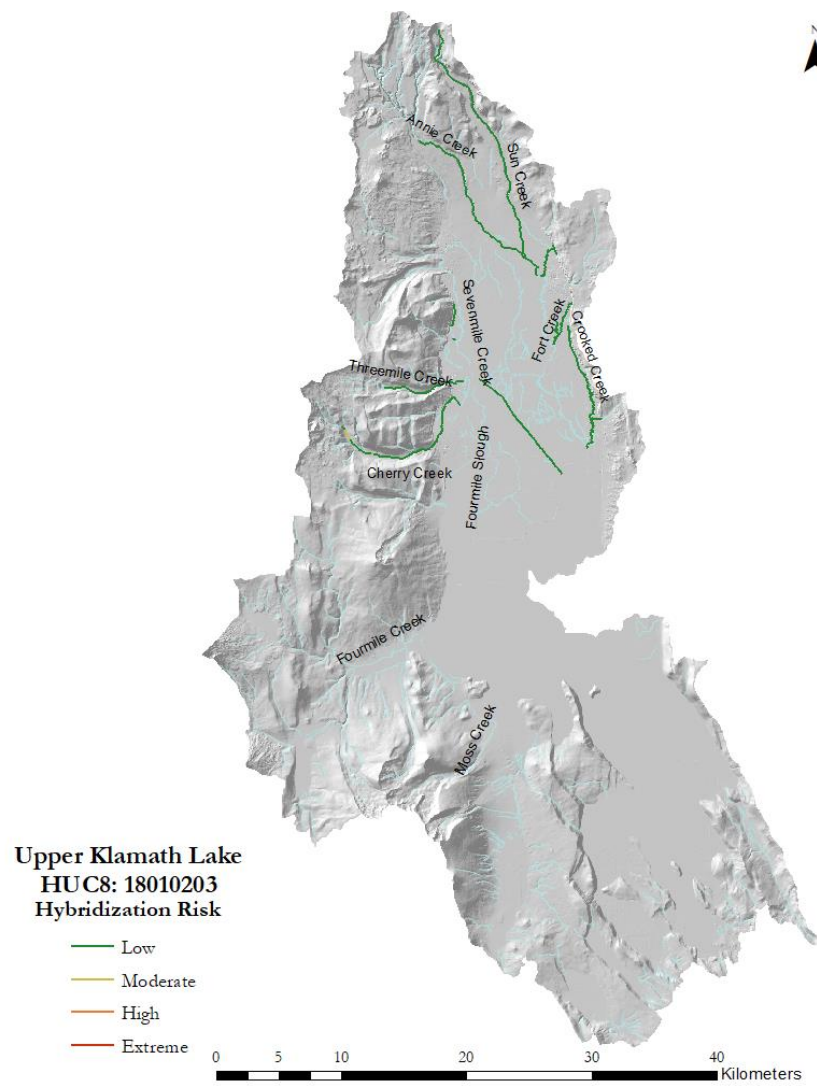

Supplement: Data_Sheet_1.PDF [file Data_Sheet_1.PDF]
